# Supplementary material
Source: MDPI journal article supplement (https://www.mdpi.com/2673-687X/4/1/2)
Supplement: s1 [file s1]

## SUPPLEMENTARY INFORMATION

# Influence of $\gamma$ -Irradiation on the Electronic Structure and the Chemical and Mechanical Properties of Poly(hydroxybutyrate-valerate)/Poly(caprolactone) Blends: Insights from Experimental Data and Computational Approaches

Francisco Rosario <sup>1</sup>, João Paulo Almirão de Jesus <sup>2</sup>, Suzan Aline Casarin <sup>3</sup> and Felipe de Almeida La Porta <sup>2,4,\*</sup>

<sup>1</sup> Department of Materials Science and Engineering, Federal University of Technology—Paraná, Londrina 86036–370, Paraná, Brazil; rosario@utfpr.edu.br

<sup>2</sup> Post-Graduation Program in Chemistry, State University of Londrina, Rodovia Celso Garcia Cid, 445, km 380, Londrina 86057-970, Paraná, Brazil; joao.paulo.almirao@uel.br

<sup>3</sup> Department of Materials Science and Engineering, Federal University of São Carlos. Rod. Washington Luiz, s/n—Monjolinho, São Carlos 13565-905, São Paulo, Brazil; suzancasarin@ufscar.br

<sup>4</sup> Laboratory of Nanotechnology and Computational Chemistry, Department of Chemistry, Federal University of Technology—Paraná, Londrina 86036–370, Paraná, Brazil

\* Correspondence: felipelaporta@utfpr.edu.br

## SUMMARY

|                                                                     |           |
|---------------------------------------------------------------------|-----------|
| <b>S.1 – CARTESIAN COORDINATES OF THE OPTIMIZED STRUCTURES.....</b> | <b>3</b>  |
| S.1.1 COORDINATES - PHBV .....                                      | 3         |
| S.1.2 COORDINATES - PCL .....                                       | 7         |
| S.1.3 COORDINATES - BA .....                                        | 10        |
| S.1.4 COORDINATES - BB .....                                        | 13        |
| S.1.5 COORDINATES - BC .....                                        | 16        |
| S.1.6 COORDINATES - BD .....                                        | 19        |
| <b>S.2 – MOLECULAR ORBITAL MAPS FROM HOMO-4 TO LUMO+4.....</b>      | <b>22</b> |
| S.2.1 MOLECULAR ORBITALS - PHBV .....                               | 22        |
| S.2.2 MOLECULAR ORBITALS - PCL .....                                | 26        |
| S.2.3 MOLECULAR ORBITALS - BA .....                                 | 28        |
| S.2.4 MOLECULAR ORBITALS - BB .....                                 | 33        |
| S.2.5 MOLECULAR ORBITALS - BC .....                                 | 38        |
| S.2.6 MOLECULAR ORBITALS - BD .....                                 | 43        |

## S.1 – CARTESIAN COORDINATES OF THE OPTIMIZED STRUCTURES

### S.1.1 COORDINATES - PHBV

0 1

|   |              |             |             |
|---|--------------|-------------|-------------|
| C | -14.83952600 | 2.37604200  | -1.63222800 |
| H | -14.93929900 | 3.39918300  | -2.05567000 |
| C | -13.44120300 | 1.80887500  | -1.69068200 |
| H | -13.09045400 | 1.87400400  | -2.73134300 |
| H | -12.79562500 | 2.49780600  | -1.12611800 |
| C | -13.29212700 | 0.38995300  | -1.14588800 |
| H | -13.71100600 | 0.32566000  | -0.13919800 |
| C | -13.90520100 | -0.68542300 | -2.03420800 |
| H | -13.74080400 | -1.67528200 | -1.60100600 |
| H | -14.98330000 | -0.52433900 | -2.11705000 |
| H | -13.46235900 | -0.65906100 | -3.03598200 |
| C | -11.39663400 | -0.64634300 | -0.07516700 |
| C | -9.88296300  | -0.72514200 | -0.10885700 |
| H | -9.56015400  | -0.95148100 | -1.13154000 |
| H | -9.50555400  | 0.27618600  | 0.12601100  |
| C | -9.30452400  | -1.73910700 | 0.88296100  |
| H | -9.70163400  | -1.53949300 | 1.88122100  |
| C | -9.53554000  | -3.19558000 | 0.48962800  |
| H | -10.61291100 | -3.32500800 | 0.34377400  |
| H | -9.05023700  | -3.37827400 | -0.47823000 |
| C | -9.03242900  | -4.20106500 | 1.53078800  |
| H | -9.53124300  | -4.05152400 | 2.49519500  |
| H | -9.23577300  | -5.22681800 | 1.20704100  |
| H | -7.95354000  | -4.10633000 | 1.68714200  |
| O | -11.84842800 | 0.17715500  | -1.04768900 |
| O | -7.85461600  | -1.55070500 | 0.92905000  |
| O | -15.80620600 | 1.81276100  | -1.16146700 |
| O | -12.11553700 | -1.21908600 | 0.71879000  |
| C | -7.36515400  | -0.57229900 | 1.71865200  |

|   |             |             |             |
|---|-------------|-------------|-------------|
| C | -5.85249700 | -0.52212700 | 1.63142700  |
| O | -8.05620900 | 0.17286800  | 2.38634000  |
| H | -5.45166700 | -1.53443200 | 1.75506700  |
| H | -5.60243600 | -0.20510600 | 0.61259300  |
| C | -5.21958100 | 0.44111900  | 2.64026500  |
| H | -5.66825200 | 1.43023000  | 2.52807400  |
| C | -5.29735200 | -0.02953400 | 4.08415200  |
| O | -3.79479300 | 0.55433500  | 2.32956800  |
| H | -4.79713300 | 0.68414900  | 4.74490200  |
| H | -6.34375600 | -0.10788400 | 4.38906100  |
| H | -4.81558000 | -1.00590200 | 4.20332600  |
| C | -3.42565200 | 1.40789900  | 1.35155800  |
| C | -1.92312800 | 1.37501800  | 1.15333200  |
| O | -4.20532200 | 2.08677800  | 0.71110700  |
| H | -1.42937400 | 1.43802500  | 2.12933900  |
| H | -1.68102200 | 0.38880900  | 0.74098000  |
| C | -1.41286200 | 2.46682200  | 0.20805900  |
| H | -1.97808800 | 2.43314900  | -0.72634600 |
| C | -1.44359500 | 3.86921100  | 0.80952600  |
| O | -0.01251400 | 2.17984800  | -0.10205600 |
| H | -2.46898200 | 4.05463700  | 1.14658100  |
| H | -0.80083800 | 3.88361500  | 1.69957800  |
| C | -1.01667300 | 4.96948600  | -0.16768500 |
| H | -1.66730600 | 4.98733900  | -1.04956700 |
| H | -1.07572900 | 5.95323000  | 0.30886100  |
| H | 0.01315600  | 4.82312300  | -0.50739900 |
| C | 0.25052300  | 1.29094200  | -1.08222900 |
| C | 1.74560300  | 1.10414000  | -1.24931000 |
| O | -0.60535500 | 0.70964600  | -1.72133600 |
| H | 2.23175000  | 2.08574700  | -1.27221800 |
| H | 2.10463000  | 0.59349000  | -0.34841500 |
| C | 2.11500100  | 0.28235600  | -2.48805400 |



|   |             |             |             |
|---|-------------|-------------|-------------|
| H | 1.58093300  | -0.66958100 | -2.46344800 |
| C | 1.87810500  | 1.00459500  | -3.80526000 |
| O | 3.54850100  | -0.00319700 | -2.43731800 |
| H | 2.18996700  | 0.37780500  | -4.64551500 |
| H | 0.81380300  | 1.22638500  | -3.91635800 |
| H | 2.44481500  | 1.94098000  | -3.84424400 |
| C | 3.96022300  | -1.04438600 | -1.68370900 |
| C | 5.46921200  | -1.17907800 | -1.73793700 |
| O | 3.21292100  | -1.75472200 | -1.03900700 |
| H | 5.79949100  | -1.10858400 | -2.78016600 |
| H | 5.88337100  | -0.30850300 | -1.21655100 |
| C | 5.98698800  | -2.46336600 | -1.08355100 |
| H | 5.58263900  | -2.54547300 | -0.07186400 |
| C | 5.69669100  | -3.72836500 | -1.88655200 |
| O | 7.44266200  | -2.36324500 | -0.98053300 |
| H | 4.61705000  | -3.75652500 | -2.06793800 |
| H | 6.18930400  | -3.64429600 | -2.86424300 |
| C | 6.13379700  | -5.01790300 | -1.18363800 |
| H | 5.62760000  | -5.13065900 | -0.21809300 |
| H | 5.88653000  | -5.89310300 | -1.79292100 |
| H | 7.21336800  | -5.02787000 | -1.00498400 |
| C | 7.95932700  | -1.69491000 | 0.07189700  |
| C | 9.47351200  | -1.67286200 | 0.00123400  |
| O | 7.28879300  | -1.16806300 | 0.93865400  |
| H | 9.83922000  | -2.68470300 | -0.20649400 |
| H | 9.74138300  | -1.05449200 | -0.86302000 |
| C | 10.12843500 | -1.10342600 | 1.26348800  |
| H | 9.70699900  | -0.11896100 | 1.47623500  |
| C | 10.02725300 | -2.01196600 | 2.47892500  |
| O | 11.55740200 | -0.93512600 | 1.00408600  |
| H | 10.54145600 | -1.56352000 | 3.33370900  |
| H | 8.97700300  | -2.15592600 | 2.74437200  |

|   |             |             |             |
|---|-------------|-------------|-------------|
| H | 10.48187800 | -2.98760200 | 2.27605200  |
| C | 11.95350800 | 0.17721900  | 0.34582600  |
| C | 13.45410300 | 0.18610900  | 0.13654600  |
| O | 11.18948000 | 1.03840000  | -0.04648600 |
| H | 13.93716300 | -0.33790700 | 0.96964600  |
| H | 13.65681900 | -0.40418300 | -0.76633800 |
| C | 14.04736000 | 1.59063100  | -0.06195000 |
| H | 13.47785200 | 2.10040300  | -0.84482800 |
| C | 14.01440200 | 2.43582100  | 1.21725000  |
| O | 15.37380600 | 1.48137600  | -0.59525400 |
| H | 12.98825000 | 2.43986600  | 1.60409100  |
| H | 14.63370000 | 1.93902300  | 1.98099400  |
| C | 14.49154600 | 3.87725400  | 1.01088000  |
| H | 15.95437000 | 1.11280100  | 0.08550000  |
| H | 13.84185900 | 4.40395200  | 0.30285500  |
| H | 14.47753000 | 4.43276100  | 1.95432000  |
| H | 15.50977800 | 3.90461300  | 0.61202200  |

## S.1.2 COORDINATES - PCL

0 1

|   |             |             |             |
|---|-------------|-------------|-------------|
| C | 16.37681100 | -0.48649400 | 0.00009700  |
| H | 17.34886300 | 0.05549100  | 0.00007100  |
| C | 15.15424200 | 0.39966200  | -0.00001500 |
| H | 15.24455000 | 1.06749300  | -0.87177500 |
| H | 15.24454000 | 1.06771900  | 0.87157100  |
| C | 13.81721800 | -0.34230500 | 0.00006900  |
| H | 13.77307200 | -1.00239800 | -0.87450300 |
| H | 13.77310000 | -1.00225000 | 0.87475500  |
| C | 12.61135900 | 0.60633000  | 0.00000600  |
| H | 12.66420500 | 1.26473800  | -0.87907500 |
| H | 12.66422100 | 1.26486400  | 0.87899100  |
| C | 11.26867600 | -0.13817300 | 0.00007000  |
| H | 11.20333000 | -0.78963600 | 0.88056100  |
| H | 11.20329700 | -0.78972700 | -0.88035100 |
| C | 10.08730100 | 0.81924300  | 0.00004100  |
| H | 10.08482900 | 1.46517000  | -0.88435500 |
| H | 10.08483800 | 1.46521900  | 0.88440300  |
| O | 16.35734400 | -1.70027400 | 0.00020500  |
| O | 8.87379000  | 0.02773000  | 0.00007800  |
| C | 7.70713700  | 0.71272100  | -0.00005800 |
| C | 6.52151200  | -0.23170800 | -0.00001400 |
| O | 7.64573400  | 1.92602600  | -0.00018700 |
| H | 6.62079200  | -0.88923900 | 0.87359200  |
| H | 6.62081200  | -0.88933900 | -0.87354300 |
| C | 5.17073000  | 0.48688100  | -0.00007400 |
| H | 5.11147000  | 1.14500500  | 0.87488400  |
| H | 5.11149600  | 1.14491100  | -0.87510300 |
| C | 3.98632400  | -0.48801300 | -0.00004000 |
| H | 4.05318700  | -1.14522900 | 0.87897900  |
| H | 4.05320200  | -1.14530500 | -0.87900200 |

|   |              |             |             |
|---|--------------|-------------|-------------|
| C | 2.62855000   | 0.22845300  | -0.00008000 |
| H | 2.54989000   | 0.87855700  | -0.88052300 |
| H | 2.54986000   | 0.87860000  | 0.88032900  |
| C | 1.46606800   | -0.75170000 | -0.00007300 |
| H | 1.47559800   | -1.39754400 | 0.88433100  |
| H | 1.47557900   | -1.39753700 | -0.88448100 |
| O | 0.23764900   | 0.01703400  | -0.00005400 |
| C | -0.91651300  | -0.68833400 | -0.00008600 |
| C | -2.11809600  | 0.23577700  | -0.00005100 |
| O | -0.95715800  | -1.90256900 | -0.00012700 |
| H | -2.02978500  | 0.89505900  | -0.87351900 |
| H | -2.02981400  | 0.89494700  | 0.87350600  |
| C | -3.45726800  | -0.50423400 | -0.00011600 |
| H | -3.50640900  | -1.16300900 | -0.87521300 |
| H | -3.50642000  | -1.16314500 | 0.87487900  |
| C | -4.65604600  | 0.45295100  | -0.00005000 |
| H | -4.59856000  | 1.11124400  | -0.87892900 |
| H | -4.59856900  | 1.11111500  | 0.87892600  |
| C | -6.00386700  | -0.28206800 | -0.00011300 |
| H | -6.07380300  | -0.93321900 | 0.88031900  |
| H | -6.07377400  | -0.93312100 | -0.88061900 |
| C | -7.17877300  | 0.68322500  | -0.00007300 |
| H | -7.17663100  | 1.32935900  | -0.88433500 |
| H | -7.17662900  | 1.32929900  | 0.88423000  |
| O | -8.39779800  | -0.09967300 | -0.00010500 |
| C | -9.55985900  | 0.59428800  | 0.00014000  |
| C | -10.75240000 | -0.34117300 | 0.00017800  |
| O | -9.61105800  | 1.80800600  | 0.00032600  |
| H | -10.65723600 | -0.99945700 | 0.87380100  |
| H | -10.65714500 | -0.99970600 | -0.87324200 |
| C | -12.09931000 | 0.38474200  | 0.00002800  |
| H | -12.15535800 | 1.04331600  | 0.87482300  |

|   |              |             |             |
|---|--------------|-------------|-------------|
| H | -12.15530100 | 1.04306500  | -0.87496000 |
| C | -13.28922100 | -0.58362200 | 0.00012100  |
| H | -13.22373200 | -1.24124100 | 0.87943500  |
| H | -13.22368000 | -1.24147600 | -0.87901200 |
| C | -14.64372100 | 0.13677900  | -0.00001500 |
| H | -14.72349700 | 0.78738700  | -0.88011900 |
| H | -14.72356900 | 0.78757800  | 0.87994000  |
| C | -15.82504500 | -0.82401200 | 0.00004000  |
| H | -15.78326100 | -1.47152400 | 0.88978600  |
| H | -15.78321800 | -1.47168300 | -0.88958800 |
| O | -17.02860400 | -0.05050400 | -0.00005600 |
| H | -17.78838700 | -0.64587300 | -0.00011900 |

## S.1.3 COORDINATES - BA

0 1

|   |              |             |             |
|---|--------------|-------------|-------------|
| C | -10.21590800 | 5.87610800  | 0.66479100  |
| H | -9.74375300  | 6.87079800  | 0.51042100  |
| C | -9.55208000  | 4.74571200  | -0.08488100 |
| H | -9.49683400  | 5.02788200  | -1.14678400 |
| H | -8.50741200  | 4.70783300  | 0.25762600  |
| C | -10.20814900 | 3.37771100  | 0.08872200  |
| H | -10.32436200 | 3.14618000  | 1.14987600  |
| C | -11.54739700 | 3.23592800  | -0.62436100 |
| H | -11.94868600 | 2.22946600  | -0.48204300 |
| H | -12.26348600 | 3.95037600  | -0.20967100 |
| H | -11.43605900 | 3.42478300  | -1.69784800 |
| C | -9.22448700  | 1.17784000  | 0.03733200  |
| C | -8.15759200  | 0.34434800  | -0.64445000 |
| H | -8.24890200  | 0.46420400  | -1.72990600 |
| H | -7.18960600  | 0.77086400  | -0.35844400 |
| C | -8.19849200  | -1.13646000 | -0.25349000 |
| H | -8.16882300  | -1.22539100 | 0.83533200  |
| C | -9.39367700  | -1.89467800 | -0.82583900 |
| H | -10.29737600 | -1.35833100 | -0.51816800 |
| H | -9.34453800  | -1.84993400 | -1.92196000 |
| C | -9.47760700  | -3.35237700 | -0.36096300 |
| H | -9.55649200  | -3.41333100 | 0.73049200  |
| H | -10.35900300 | -3.84344100 | -0.78582300 |
| H | -8.59488600  | -3.92014100 | -0.67047000 |
| O | -9.24997800  | 2.42881800  | -0.47716000 |
| O | -7.00409600  | -1.78169100 | -0.79214100 |
| O | -11.17674600 | 5.76308900  | 1.39779700  |
| O | -9.94868300  | 0.79898300  | 0.93563300  |
| C | -5.85490400  | -1.68899300 | -0.08270500 |
| C | -4.73955200  | -2.46006100 | -0.76081500 |

|   |             |             |             |
|---|-------------|-------------|-------------|
| O | -5.75188900 | -1.06807500 | 0.95672500  |
| H | -4.66329700 | -2.09705900 | -1.79398200 |
| H | -5.06475100 | -3.50580500 | -0.84229900 |
| C | -3.39537900 | -2.35772900 | -0.03706100 |
| H | -3.10033700 | -1.30400900 | 0.03275600  |
| H | -3.51323800 | -2.70650400 | 0.99554300  |
| C | -2.29100000 | -3.16090800 | -0.73677200 |
| H | -2.18168200 | -2.80821800 | -1.77227100 |
| H | -2.59319800 | -4.21655600 | -0.80146700 |
| C | -0.93750700 | -3.05945300 | -0.01949600 |
| H | -1.03610200 | -3.41384600 | 1.01453300  |
| H | -0.61934900 | -2.01132300 | 0.02472200  |
| C | 0.14362700  | -3.87622600 | -0.72016600 |
| H | 0.32051400  | -3.51130300 | -1.73536600 |
| H | -0.12112600 | -4.93642300 | -0.75478700 |
| O | 1.39327500  | -3.84245000 | 0.01443900  |
| C | 2.24790600  | -2.82746900 | -0.25770700 |
| C | 3.49423700  | -2.92964100 | 0.59858300  |
| O | 2.02715100  | -1.96337400 | -1.08269300 |
| H | 3.94879200  | -3.91066600 | 0.40795200  |
| H | 3.17241500  | -2.95587900 | 1.64794400  |
| C | 4.49684900  | -1.79959900 | 0.35666900  |
| H | 4.80229700  | -1.80483800 | -0.69618900 |
| H | 4.00103200  | -0.83560600 | 0.52160200  |
| C | 5.73331400  | -1.90945600 | 1.25849100  |
| H | 6.22574200  | -2.87785300 | 1.09036300  |
| H | 5.41696500  | -1.90398100 | 2.31200800  |
| C | 6.74312000  | -0.77756200 | 1.02247600  |
| H | 6.25770900  | 0.19363900  | 1.18303000  |
| H | 7.08956100  | -0.79994100 | -0.01739500 |
| C | 7.94859600  | -0.88602700 | 1.95072300  |
| H | 8.50370200  | -1.81097200 | 1.77357700  |

|   |             |             |             |
|---|-------------|-------------|-------------|
| H | 7.64396600  | -0.83888900 | 2.99980500  |
| O | 8.84830000  | 0.23888500  | 1.78679100  |
| C | 9.82758300  | 0.12505300  | 0.85698200  |
| C | 10.66490400 | 1.38690500  | 0.80424300  |
| O | 9.99356600  | -0.86318200 | 0.17041700  |
| H | 10.98034300 | 1.62123800  | 1.82892200  |
| H | 9.99817300  | 2.20853100  | 0.50920900  |
| C | 11.86651900 | 1.29206000  | -0.13851100 |
| H | 12.50373900 | 0.45447600  | 0.16970300  |
| H | 11.51728900 | 1.04834700  | -1.14857200 |
| C | 12.68857100 | 2.58704000  | -0.16755700 |
| H | 13.02671400 | 2.82542300  | 0.85161600  |
| H | 12.04231800 | 3.42122500  | -0.47795800 |
| C | 13.90206800 | 2.50450700  | -1.10276800 |
| H | 13.57466400 | 2.27933400  | -2.12565300 |
| H | 14.55899200 | 1.68130600  | -0.79460100 |
| C | 14.71733100 | 3.79035000  | -1.12775800 |
| H | 15.07943100 | 4.02555800  | -0.11475700 |
| H | 14.08714600 | 4.62885200  | -1.46295100 |
| O | 15.81802900 | 3.60246400  | -2.02210700 |
| H | 16.34499000 | 4.41066700  | -2.05153100 |



## S.1.4 COORDINATES - BB

0 1

|   |              |             |             |
|---|--------------|-------------|-------------|
| C | -12.96696400 | 5.01373600  | -0.64218000 |
| H | -13.82639400 | 5.56403600  | -0.19804900 |
| C | -11.97329900 | 4.47229400  | 0.35754500  |
| H | -12.54026500 | 3.84330100  | 1.06244600  |
| H | -11.63147700 | 5.32787400  | 0.96207700  |
| C | -10.79488500 | 3.71011600  | -0.24949800 |
| H | -11.17751300 | 2.87136900  | -0.84311900 |
| H | -10.27120500 | 4.36378900  | -0.95729500 |
| C | -9.81186400  | 3.19343100  | 0.80965600  |
| H | -10.34534600 | 2.54425600  | 1.51852100  |
| H | -9.42890200  | 4.04123400  | 1.39640300  |
| C | -8.63353200  | 2.42010900  | 0.20086000  |
| H | -8.09358900  | 3.06013600  | -0.50849600 |
| H | -9.00827600  | 1.55620600  | -0.36048600 |
| C | -7.65949100  | 1.93543000  | 1.26974400  |
| H | -8.14161700  | 1.23984900  | 1.96132700  |
| H | -7.23756300  | 2.77375800  | 1.83020900  |
| O | -12.88267700 | 4.88780000  | -1.84662700 |
| O | -6.50500200  | 1.28346700  | 0.67946300  |
| C | -6.57877600  | -0.04928100 | 0.47381500  |
| C | -5.27489200  | -0.57005200 | -0.09628400 |
| O | -7.55499900  | -0.72426200 | 0.73645400  |
| H | -4.99160800  | 0.04584400  | -0.95757300 |
| H | -4.50720700  | -0.41377600 | 0.66965300  |
| C | -5.32626200  | -2.05164100 | -0.48175600 |
| H | -5.65351600  | -2.63926700 | 0.37847700  |
| C | -6.18465200  | -2.34922900 | -1.70121900 |
| O | -3.97100300  | -2.47764200 | -0.82937900 |
| H | -6.14797800  | -3.41547800 | -1.94207700 |
| H | -7.22231600  | -2.07642100 | -1.49453200 |

|   |             |             |             |
|---|-------------|-------------|-------------|
| H | -5.83308300 | -1.78642800 | -2.57265100 |
| C | -3.13401500 | -2.80915500 | 0.17742200  |
| C | -1.77513400 | -3.20241500 | -0.36717900 |
| O | -3.43941200 | -2.77332300 | 1.35363500  |
| H | -1.90978900 | -3.95346900 | -1.15417600 |
| H | -1.35739500 | -2.31192000 | -0.84962900 |
| C | -0.80853300 | -3.70369800 | 0.71025400  |
| H | -0.76880300 | -2.97853000 | 1.52679000  |
| C | -1.14031100 | -5.09616200 | 1.24059000  |
| O | 0.52532500  | -3.79120000 | 0.12077700  |
| H | -2.18084100 | -5.07494300 | 1.58128400  |
| H | -1.08377600 | -5.81049700 | 0.40850700  |
| C | -0.23247900 | -5.55007900 | 2.38854600  |
| H | -0.30095900 | -4.86264300 | 3.23942700  |
| H | -0.52311100 | -6.54499200 | 2.74099200  |
| H | 0.81439600  | -5.59800900 | 2.07367600  |
| C | 1.26871900  | -2.66155800 | 0.06408200  |
| C | 2.62685600  | -2.93808200 | -0.55046200 |
| O | 0.87915100  | -1.57763600 | 0.45186900  |
| H | 2.45532800  | -3.30517200 | -1.57157500 |
| H | 3.07596300  | -3.78017800 | -0.00884300 |
| C | 3.55476800  | -1.72152600 | -0.55309400 |
| H | 3.06232200  | -0.89172400 | -1.07335600 |
| H | 3.70790100  | -1.38187300 | 0.47814300  |
| C | 4.91024900  | -2.01774800 | -1.20832700 |
| H | 4.74973900  | -2.34745000 | -2.24544600 |
| H | 5.39296400  | -2.85815900 | -0.68948100 |
| C | 5.85205500  | -0.80547000 | -1.19643800 |
| H | 6.04182600  | -0.49461400 | -0.16256300 |
| H | 5.37719300  | 0.04088300  | -1.70914500 |
| C | 7.18395900  | -1.11046400 | -1.87458800 |
| H | 7.04029600  | -1.38498100 | -2.92314500 |

|   |             |             |             |
|---|-------------|-------------|-------------|
| H | 7.71640100  | -1.91312500 | -1.35741800 |
| O | 8.03602900  | 0.06159300  | -1.92409500 |
| C | 8.84740400  | 0.28549000  | -0.86196700 |
| C | 9.67057200  | 1.54090900  | -1.06937400 |
| O | 8.89770400  | -0.43982300 | 0.11117900  |
| H | 8.97699500  | 2.35795900  | -1.30645600 |
| H | 10.26975100 | 1.39405900  | -1.97806600 |
| C | 10.55952000 | 1.89711800  | 0.12370500  |
| H | 9.93476500  | 2.02415500  | 1.01590300  |
| H | 11.22729100 | 1.05561500  | 0.34206000  |
| C | 11.38367000 | 3.16847800  | -0.11879100 |
| H | 10.70486500 | 4.00447400  | -0.34301300 |
| H | 12.00719500 | 3.03249700  | -1.01471300 |
| C | 12.27488200 | 3.53913600  | 1.07342300  |
| H | 12.96721800 | 2.71732600  | 1.29585200  |
| H | 11.66096800 | 3.68463600  | 1.97128700  |
| C | 13.08727800 | 4.80453800  | 0.83283400  |
| H | 12.41270700 | 5.65223600  | 0.63531400  |
| H | 13.73236200 | 4.67511700  | -0.05022200 |
| O | 13.87825000 | 5.05489000  | 1.99830000  |
| H | 14.39812000 | 5.85678900  | 1.86266100  |

## S.1.5 COORDINATES - BC

0 1

|   |             |             |             |
|---|-------------|-------------|-------------|
| C | 14.90871800 | 3.61760500  | 0.67850600  |
| H | 15.86566700 | 3.77194700  | 1.22555300  |
| C | 14.24806000 | 2.28113000  | 0.91756900  |
| H | 14.12085900 | 2.17773500  | 2.00705000  |
| H | 14.98751200 | 1.50907400  | 0.64997800  |
| C | 12.92654900 | 2.07040400  | 0.17780500  |
| H | 12.22168200 | 2.85737200  | 0.47149200  |
| H | 13.09193000 | 2.20286900  | -0.89810400 |
| C | 12.30865600 | 0.69148900  | 0.44573000  |
| H | 12.15747900 | 0.56184200  | 1.52685900  |
| H | 13.01710400 | -0.09155500 | 0.13765000  |
| C | 10.97192500 | 0.48729300  | -0.28113300 |
| H | 11.11060800 | 0.61711300  | -1.36203900 |
| H | 10.25273500 | 1.24622900  | 0.04818300  |
| C | 10.38713200 | -0.89705600 | -0.01941300 |
| H | 10.18403300 | -1.04596900 | 1.04437300  |
| H | 11.05775900 | -1.68353500 | -0.37593800 |
| O | 14.47428300 | 4.49060400  | -0.04451100 |
| O | 9.16071000  | -1.10666400 | -0.76375200 |
| C | 8.00191400  | -0.72723300 | -0.17365700 |
| C | 6.82132400  | -0.99659700 | -1.08491900 |
| O | 7.93953200  | -0.23662300 | 0.93598400  |
| H | 6.90409200  | -2.02855200 | -1.44788700 |
| H | 6.94522900  | -0.36238900 | -1.97339500 |
| C | 5.46569400  | -0.74692300 | -0.42036400 |
| H | 5.37500900  | -1.38465500 | 0.46713600  |
| H | 5.42600800  | 0.28579100  | -0.05518100 |
| C | 4.29087500  | -1.01248200 | -1.37086400 |
| H | 4.34430200  | -2.04728000 | -1.73808800 |
| H | 4.38388400  | -0.36637700 | -2.25602900 |

|   |             |             |             |
|---|-------------|-------------|-------------|
| C | 2.92573400  | -0.77878100 | -0.70800300 |
| H | 2.85606700  | 0.25687200  | -0.35175100 |
| H | 2.82253200  | -1.43197300 | 0.16611700  |
| C | 1.77374700  | -1.05029500 | -1.66973000 |
| H | 1.76659100  | -2.09355600 | -1.99595200 |
| H | 1.82341000  | -0.39533900 | -2.54341900 |
| O | 0.49015500  | -0.74049100 | -1.06586200 |
| C | -0.12039500 | -1.72029100 | -0.36589300 |
| C | -1.46823900 | -1.25034900 | 0.14312900  |
| O | 0.34889500  | -2.82908400 | -0.19788100 |
| H | -1.35659800 | -0.25646900 | 0.59054500  |
| H | -2.11551000 | -1.13277900 | -0.73335300 |
| C | -2.11498300 | -2.22426800 | 1.13267700  |
| H | -2.17729800 | -3.21502200 | 0.67807300  |
| C | -1.42015900 | -2.28940700 | 2.48396000  |
| O | -3.47667500 | -1.76411300 | 1.40218100  |
| H | -1.95061600 | -2.97274700 | 3.15319900  |
| H | -0.39892300 | -2.65627600 | 2.35457400  |
| H | -1.38819800 | -1.30084500 | 2.95450400  |
| C | -4.44275400 | -2.09232300 | 0.51741300  |
| C | -5.77818800 | -1.51987100 | 0.94954200  |
| O | -4.24697600 | -2.74247700 | -0.49110800 |
| H | -5.96575000 | -1.79955600 | 1.99268100  |
| H | -5.67771900 | -0.42923400 | 0.92879900  |
| C | -6.94266900 | -1.94558000 | 0.04968500  |
| H | -6.68517900 | -1.74550800 | -0.99338300 |
| C | -7.36535400 | -3.40102300 | 0.23182200  |
| O | -8.10529600 | -1.12987800 | 0.39124000  |
| H | -6.47282000 | -4.01905500 | 0.08849300  |
| H | -7.69727900 | -3.54250600 | 1.26897800  |
| C | -8.46281400 | -3.84866000 | -0.73937700 |
| H | -8.13482700 | -3.74111400 | -1.77963200 |

|   |              |             |             |
|---|--------------|-------------|-------------|
| H | -8.71663800  | -4.90130700 | -0.57790100 |
| H | -9.37516600  | -3.25896100 | -0.60789100 |
| C | -8.20019100  | 0.10117500  | -0.16472100 |
| C | -9.49331000  | 0.78080200  | 0.24010300  |
| O | -7.35361800  | 0.57682400  | -0.89547800 |
| H | -9.60513000  | 0.67733200  | 1.32660300  |
| H | -10.31609000 | 0.19751000  | -0.19601400 |
| C | -9.57592600  | 2.24602100  | -0.19369100 |
| H | -8.74610100  | 2.80434200  | 0.25677800  |
| H | -9.42777300  | 2.31037000  | -1.27761400 |
| C | -10.90944500 | 2.89997600  | 0.19105800  |
| H | -11.05384700 | 2.82320800  | 1.27879700  |
| H | -11.73566100 | 2.33708400  | -0.26765900 |
| C | -10.99452600 | 4.37160500  | -0.23361300 |
| H | -10.86040200 | 4.45800000  | -1.31930500 |
| H | -10.18137900 | 4.94443600  | 0.22997100  |
| C | -12.31941800 | 5.02075900  | 0.14351400  |
| H | -12.46610800 | 4.97048400  | 1.23373900  |
| H | -13.15196900 | 4.48034800  | -0.33336700 |
| O | -12.28918400 | 6.38207100  | -0.29512100 |
| H | -13.12387200 | 6.80852700  | -0.06457700 |

## S.1.6 COORDINATES - BD

0 1

|   |             |             |             |
|---|-------------|-------------|-------------|
| C | 14.15557300 | 5.37689400  | -0.08804100 |
| H | 15.02337100 | 5.92498300  | -0.51858400 |
| C | 14.06480300 | 3.92155400  | -0.47999000 |
| H | 15.01731200 | 3.45305700  | -0.18387700 |
| H | 14.06870400 | 3.88633500  | -1.58120800 |
| C | 12.86665000 | 3.16848100  | 0.09927100  |
| H | 12.88798400 | 3.24650400  | 1.19284800  |
| H | 11.94278100 | 3.66650400  | -0.21823100 |
| C | 12.83250100 | 1.69240400  | -0.31862500 |
| H | 13.75781800 | 1.19807200  | 0.01209700  |
| H | 12.82134600 | 1.62274800  | -1.41572200 |
| C | 11.61962900 | 0.94215200  | 0.24984500  |
| H | 10.69522500 | 1.41421500  | -0.10243900 |
| H | 11.62104300 | 1.00609900  | 1.34548000  |
| C | 11.61278500 | -0.52719000 | -0.15971900 |
| H | 12.50098000 | -1.04583000 | 0.21113800  |
| H | 11.55477200 | -0.63500900 | -1.24608400 |
| O | 13.37159100 | 5.95355300  | 0.63750300  |
| O | 10.50336400 | -1.24126200 | 0.44185500  |
| C | 9.32852800  | -1.24704300 | -0.23245700 |
| C | 8.27811400  | -2.03484100 | 0.52450900  |
| O | 9.16310000  | -0.69656100 | -1.30271900 |
| H | 8.22301300  | -1.62597700 | 1.54154400  |
| H | 8.65713300  | -3.05899500 | 0.64140600  |
| C | 6.90488600  | -2.02988200 | -0.15010100 |
| H | 6.55478400  | -0.99572500 | -0.25126800 |
| H | 7.00197600  | -2.41632100 | -1.17138800 |
| C | 5.86863000  | -2.85522200 | 0.62397000  |
| H | 5.78385200  | -2.46850000 | 1.64949300  |
| H | 6.22312900  | -3.89259100 | 0.71453800  |

|   |             |             |             |
|---|-------------|-------------|-------------|
| C | 4.48439900  | -2.84291800 | -0.03979100 |
| H | 4.55923100  | -3.22464500 | -1.06606500 |
| H | 4.11319900  | -1.81329300 | -0.10207700 |
| C | 3.47381000  | -3.68782300 | 0.72915100  |
| H | 3.32615000  | -3.30476600 | 1.74231000  |
| H | 3.78711500  | -4.73417000 | 0.77698300  |
| O | 2.19196500  | -3.72747300 | 0.05180600  |
| C | 1.30319600  | -2.74834700 | 0.34407500  |
| C | 0.03120000  | -2.91855100 | -0.46250100 |
| O | 1.51631700  | -1.86109500 | 1.14612500  |
| H | -0.33021800 | -3.94301100 | -0.30702800 |
| H | 0.30819200  | -2.86399200 | -1.52395500 |
| C | -1.04980300 | -1.89019800 | -0.12355100 |
| H | -1.30900000 | -1.97365000 | 0.93860300  |
| H | -0.64295400 | -0.88090700 | -0.25600500 |
| C | -2.31064900 | -2.06136800 | -0.98091900 |
| H | -2.70792000 | -3.07805700 | -0.85061500 |
| H | -2.04322500 | -1.96917800 | -2.04382300 |
| C | -3.40488400 | -1.04041100 | -0.63792900 |
| H | -3.01681900 | -0.02153700 | -0.76330600 |
| H | -3.69775100 | -1.15041200 | 0.41266500  |
| C | -4.63792700 | -1.21193300 | -1.51866500 |
| H | -5.09534200 | -2.19429100 | -1.37562100 |
| H | -4.39262500 | -1.07397600 | -2.57487000 |
| O | -5.63299300 | -0.18966300 | -1.24781500 |
| C | -6.54348200 | -0.44822700 | -0.28482300 |
| C | -7.53576300 | 0.69177300  | -0.17033500 |
| O | -6.56475700 | -1.46985200 | 0.37347200  |
| H | -6.98729700 | 1.63866400  | -0.10965700 |
| H | -8.10411200 | 0.71357200  | -1.10685800 |
| C | -8.49705600 | 0.54089500  | 1.01251300  |
| H | -8.98762300 | -0.43301100 | 0.95708100  |



|   |              |             |             |
|---|--------------|-------------|-------------|
| C | -7.84705800  | 0.74479900  | 2.37221600  |
| O | -9.52836500  | 1.57164800  | 0.90057900  |
| H | -8.59201400  | 0.65504800  | 3.16797800  |
| H | -7.07909600  | -0.01634800 | 2.53030100  |
| H | -7.38724000  | 1.73660500  | 2.44059300  |
| C | -10.57170600 | 1.33480400  | 0.07443300  |
| C | -11.52805600 | 2.51029200  | 0.05394900  |
| O | -10.69789400 | 0.31824900  | -0.58099300 |
| H | -11.58783400 | 2.93875500  | 1.06192800  |
| H | -11.07814200 | 3.28116000  | -0.58474500 |
| C | -12.92293500 | 2.17573900  | -0.49732500 |
| H | -12.80301000 | 1.66287700  | -1.45638100 |
| C | -13.74208700 | 1.28958900  | 0.44864000  |
| O | -13.61436700 | 3.38976900  | -0.82221700 |
| H | -13.14084400 | 0.40999500  | 0.70708200  |
| H | -13.90876500 | 1.84152400  | 1.38747500  |
| C | -15.08327000 | 0.84071700  | -0.14096900 |
| H | -13.82779000 | 3.85537300  | -0.00127400 |
| H | -14.92818700 | 0.23166000  | -1.03865400 |
| H | -15.64442100 | 0.23645300  | 0.57943400  |
| H | -15.70073900 | 1.69865900  | -0.42298800 |

## S.2 – MOLECULAR ORBITAL MAPS FROM HOMO-4 TO LUMO+4

### S.2.1 MOLECULAR ORBITALS - PHBV

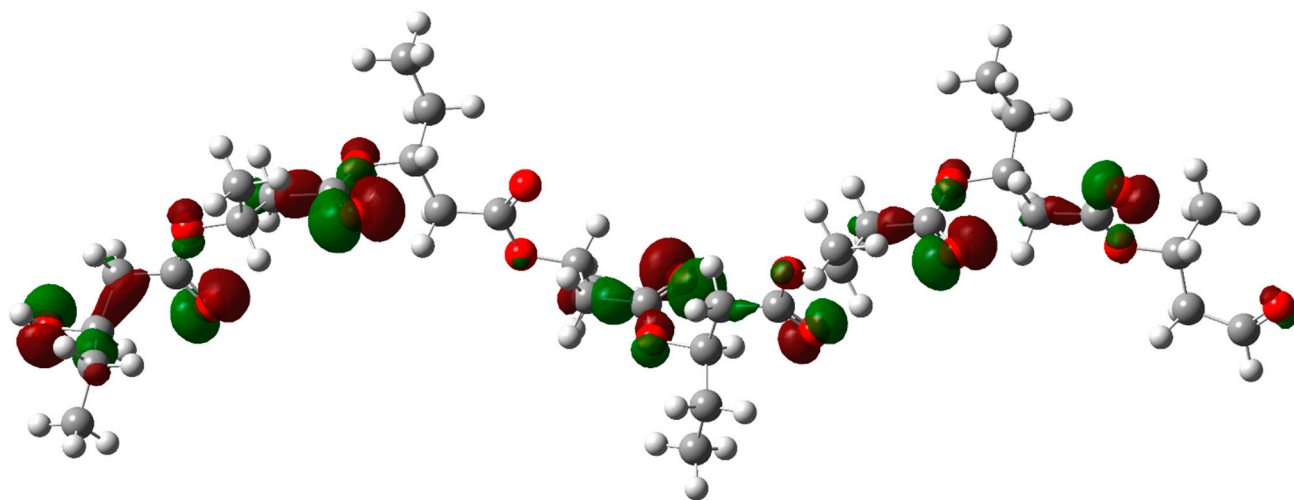

HOMO-4

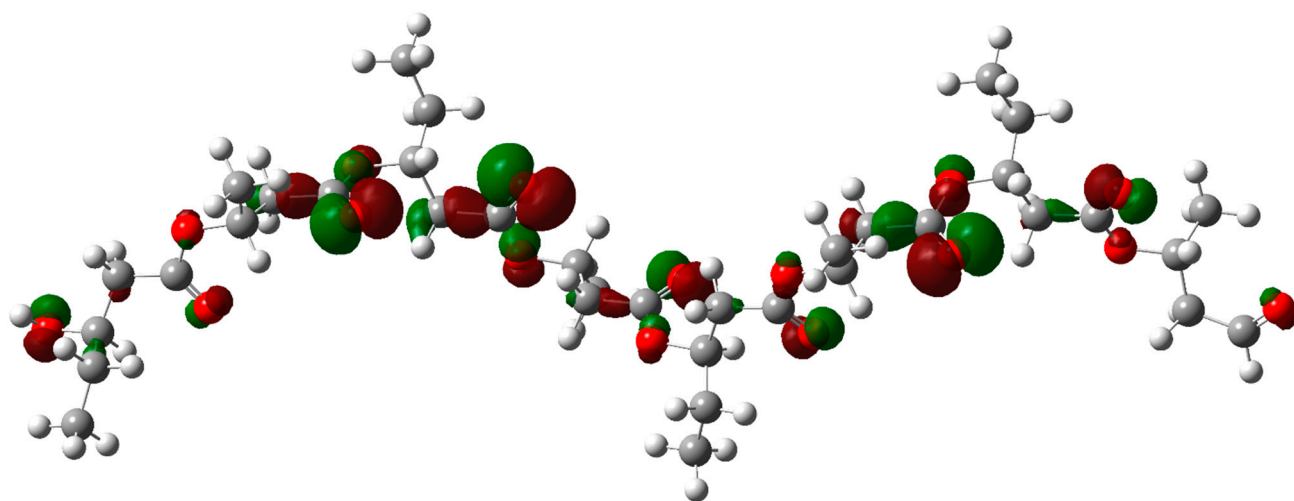

HOMO-3

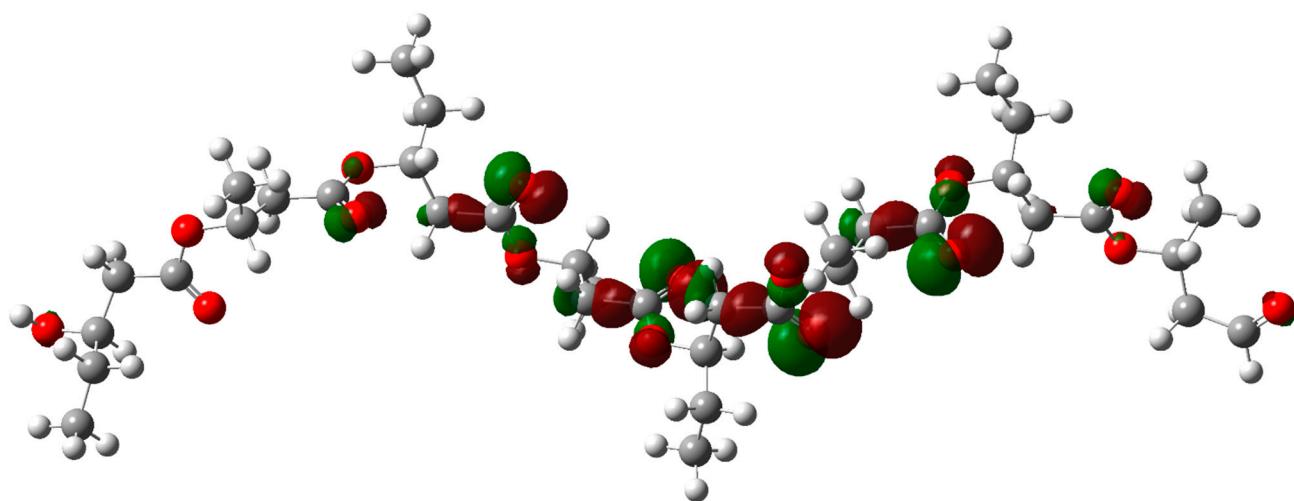**HOMO-2**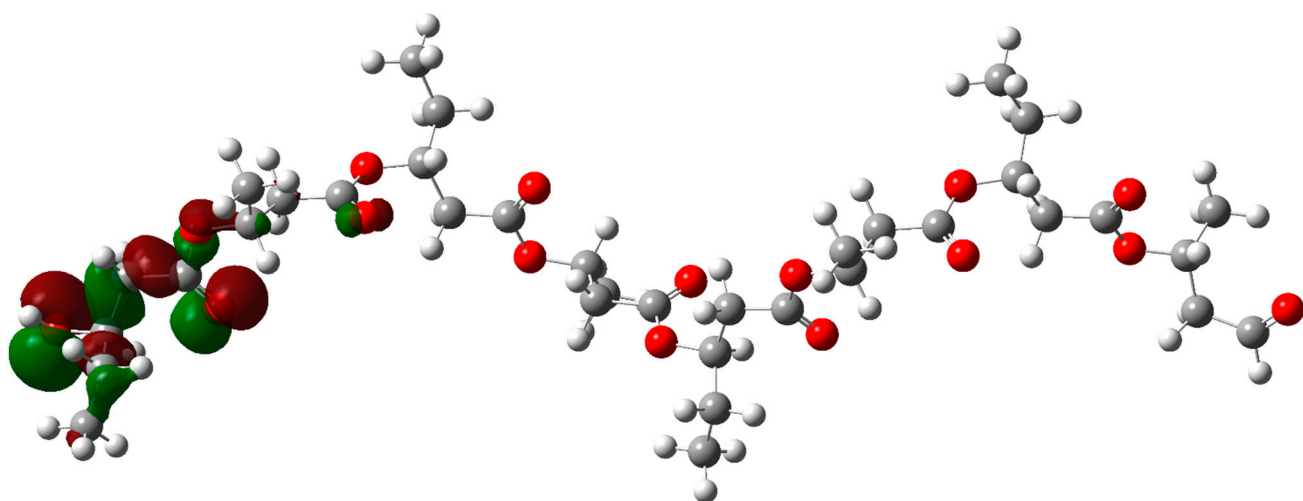**HOMO-1**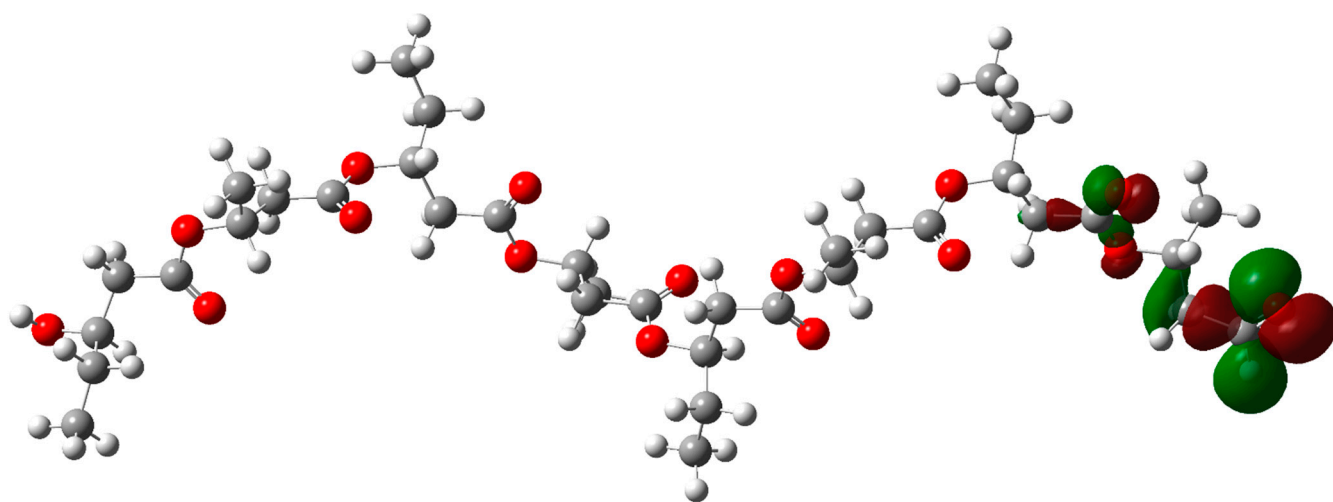**HOMO**

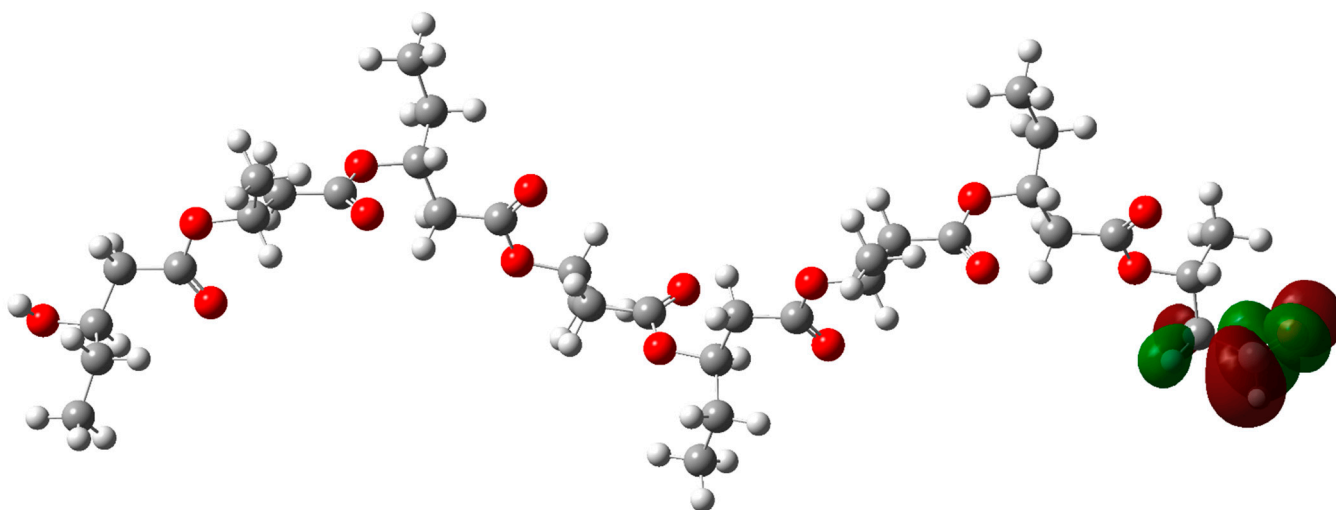**LUMO**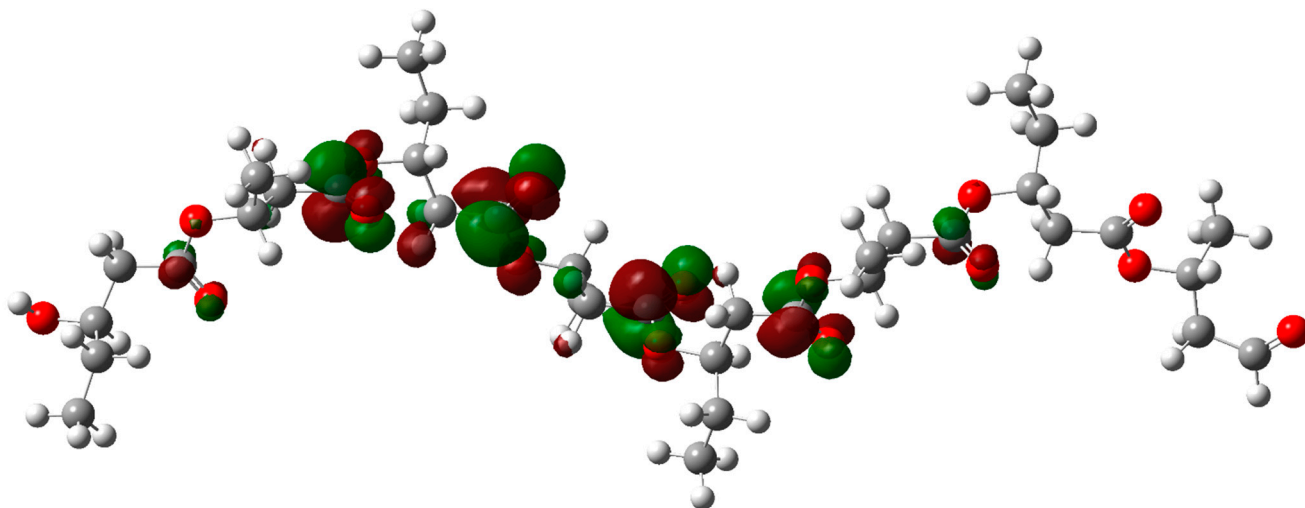**LUMO+1**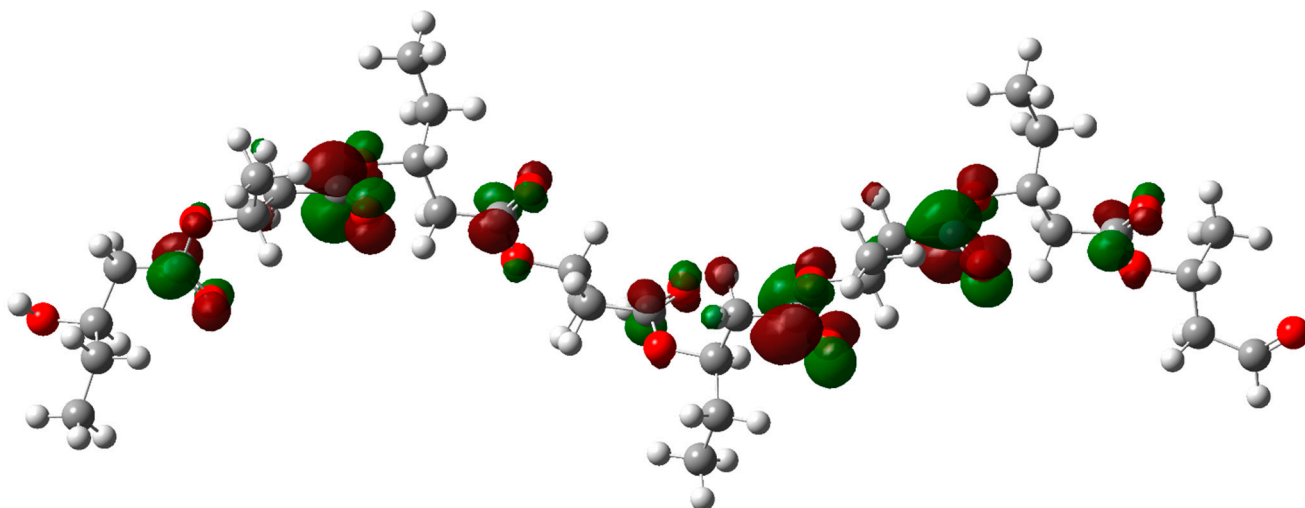**LUMO+2**

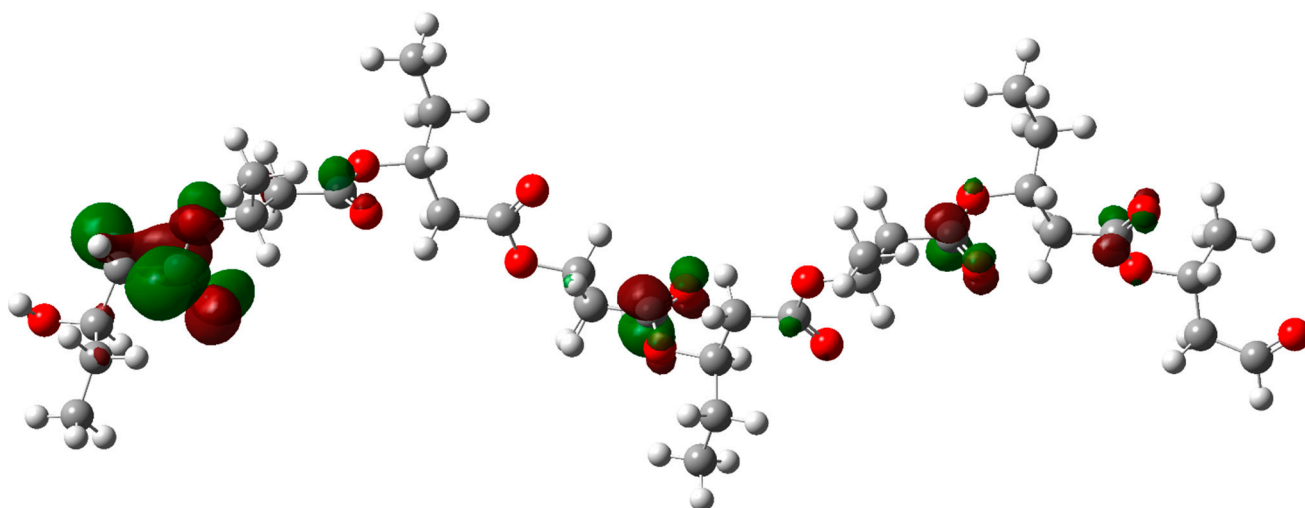**LUMO+3**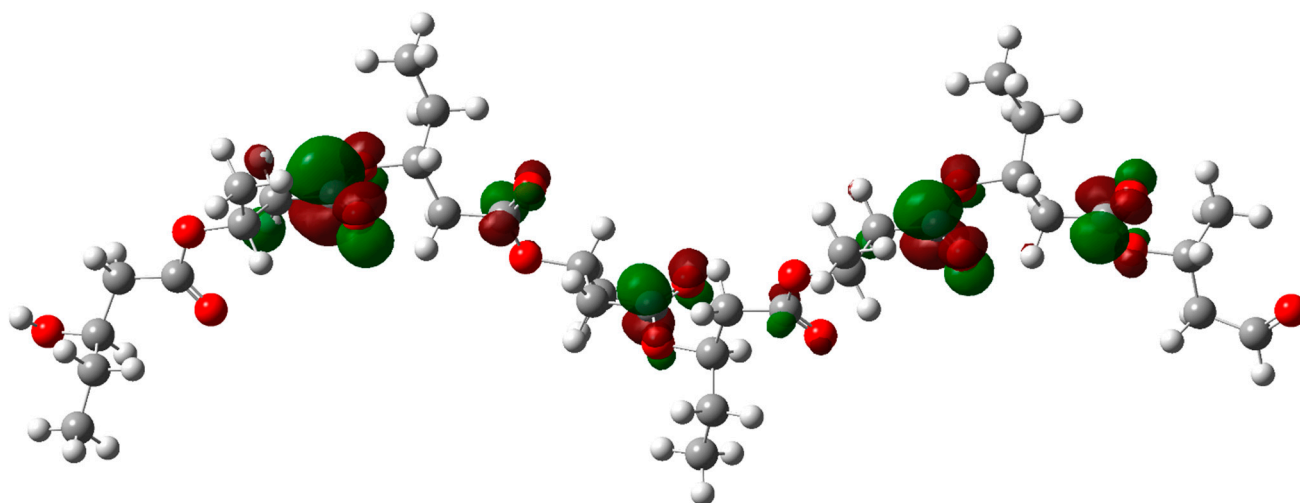**LUMO+4**

## S.2.2 MOLECULAR ORBITALS - PCL

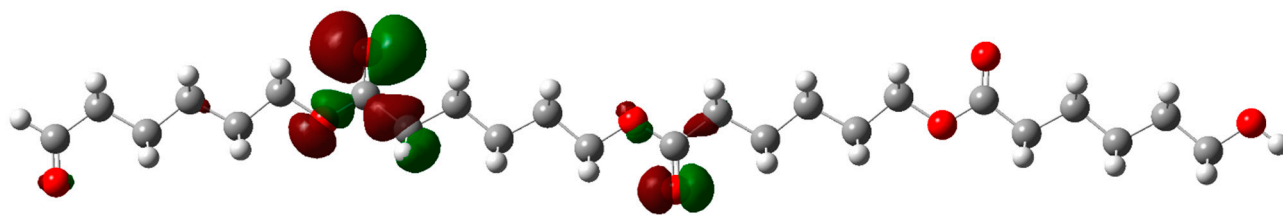

HOMO-4

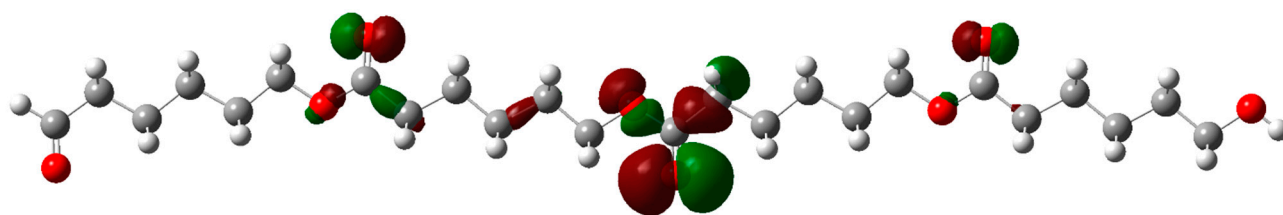

HOMO-3

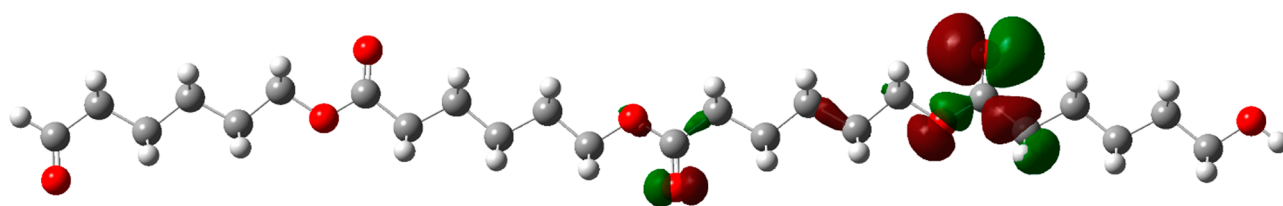

HOMO-2

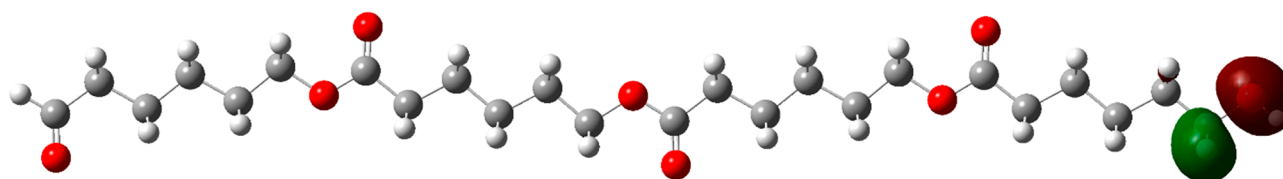

HOMO-1

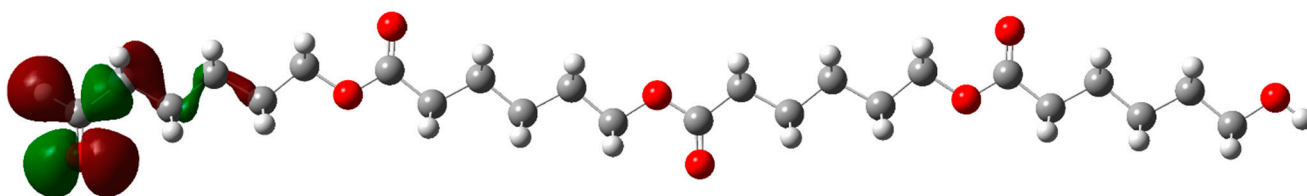

HOMO

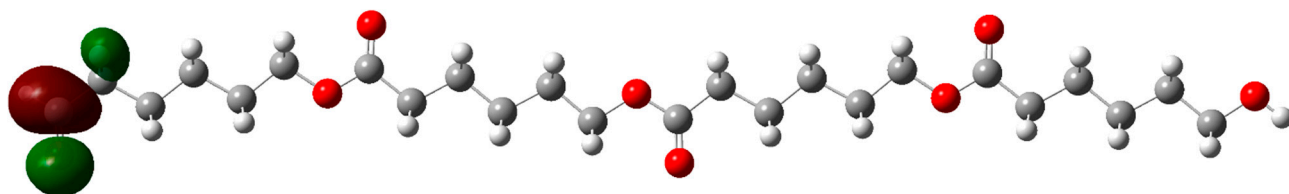**LUMO**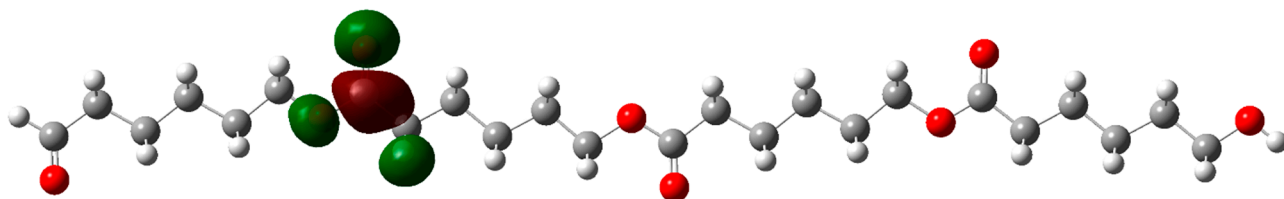**LUMO+1**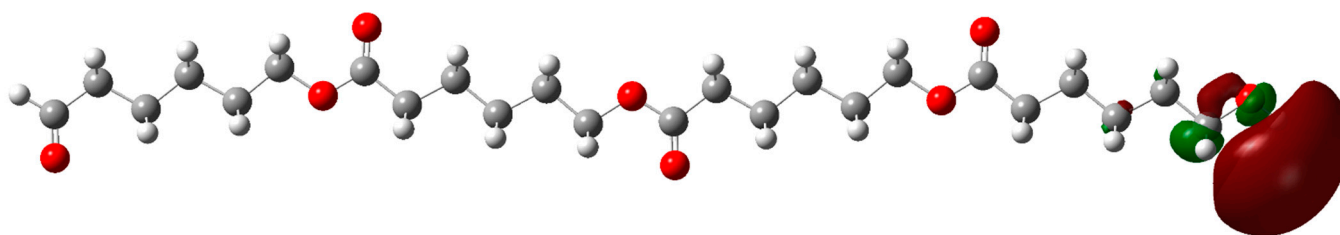**LUMO+2**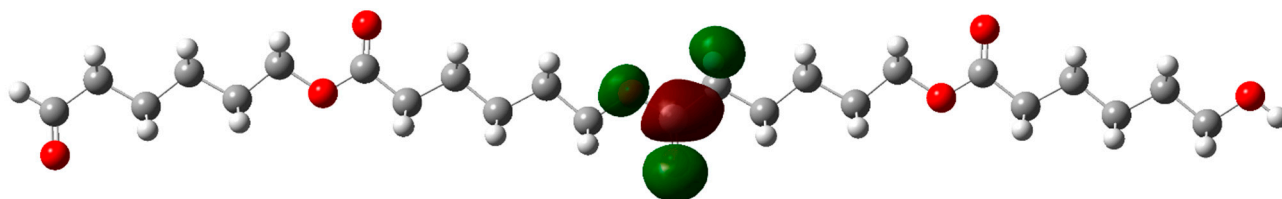**LUMO+3**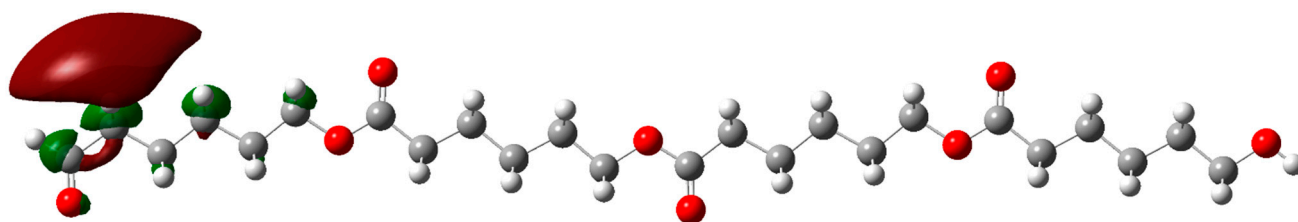**LUMO+4**

## S.2.3 MOLECULAR ORBITALS - BA

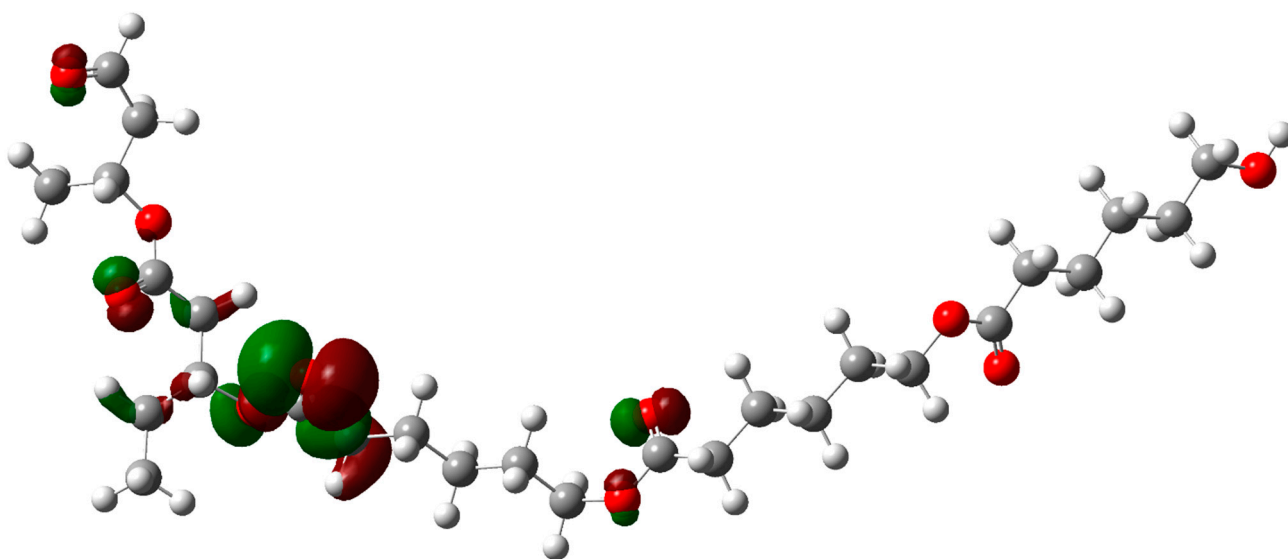

HOMO-4

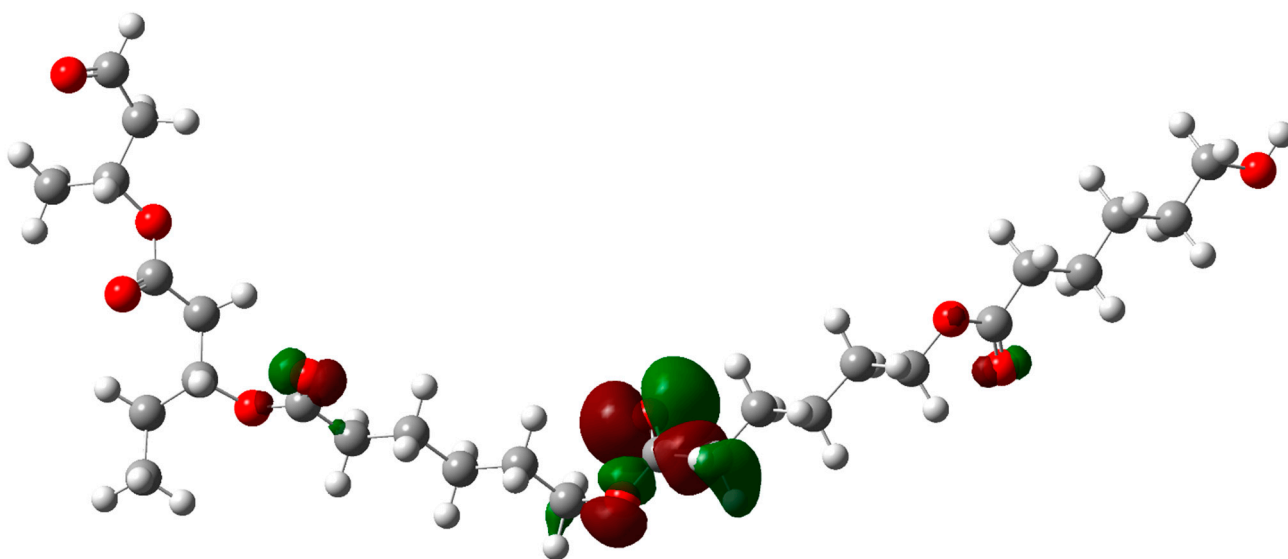

HOMO-3



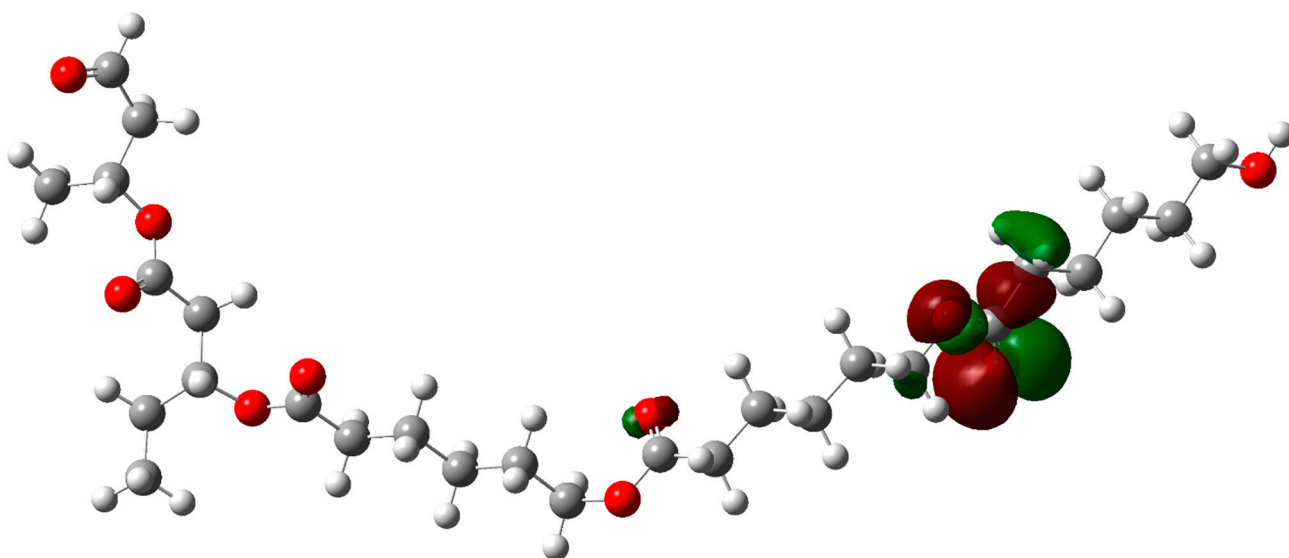**HOMO-2**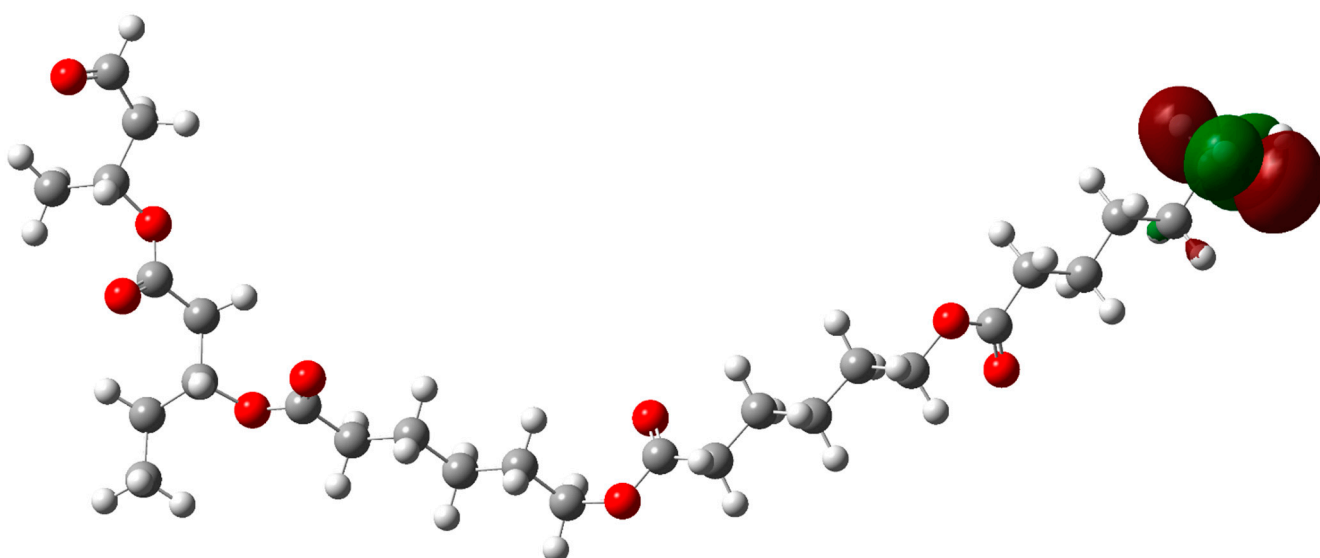**HOMO-1**

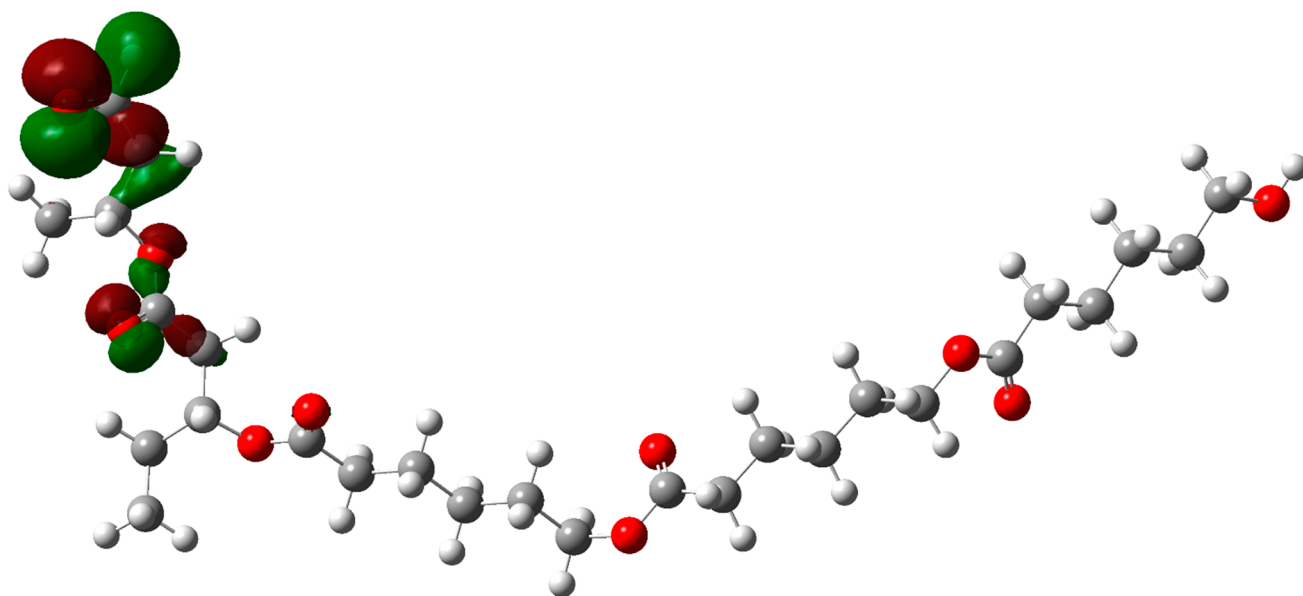**HOMO**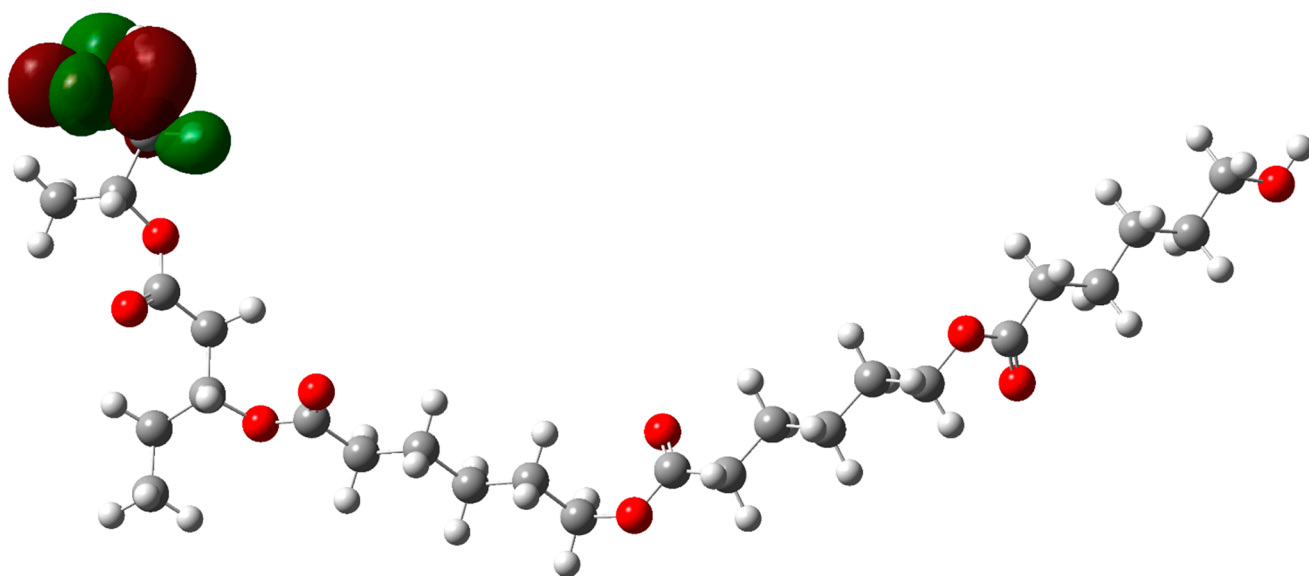**LUMO**

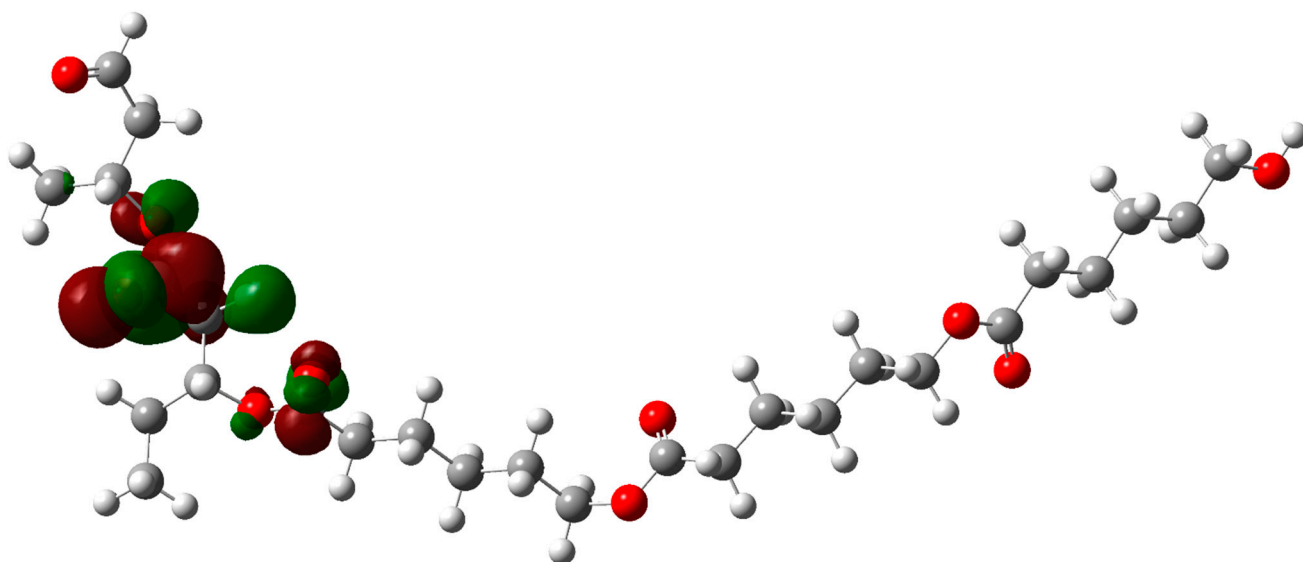**LUMO+1**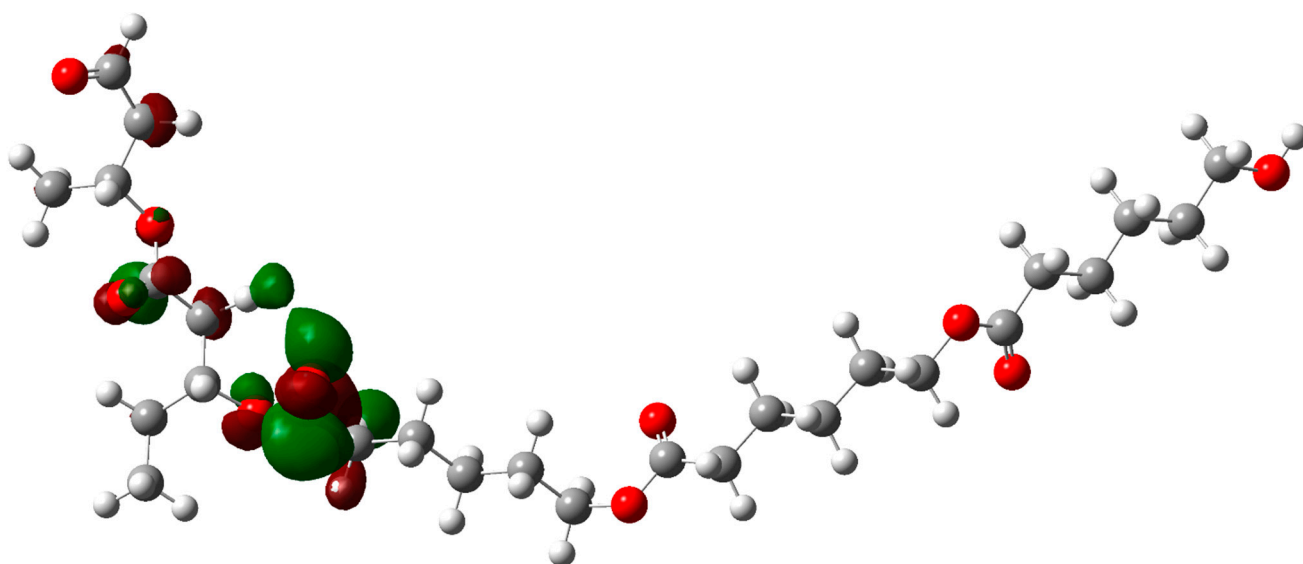**LUMO+2**

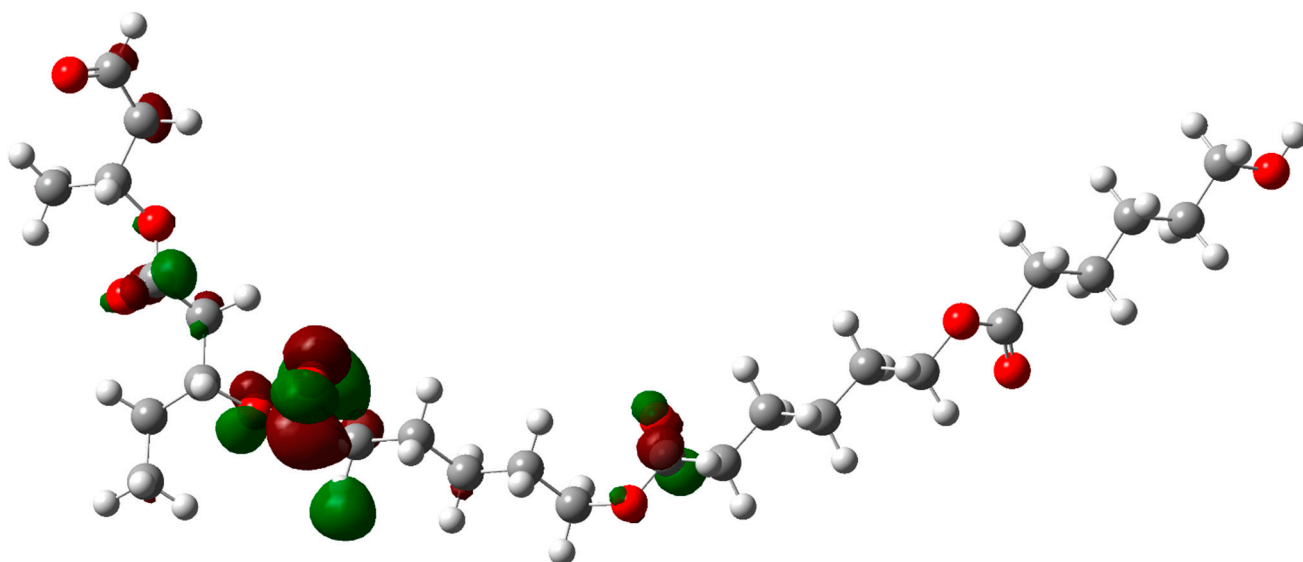**LUMO+3**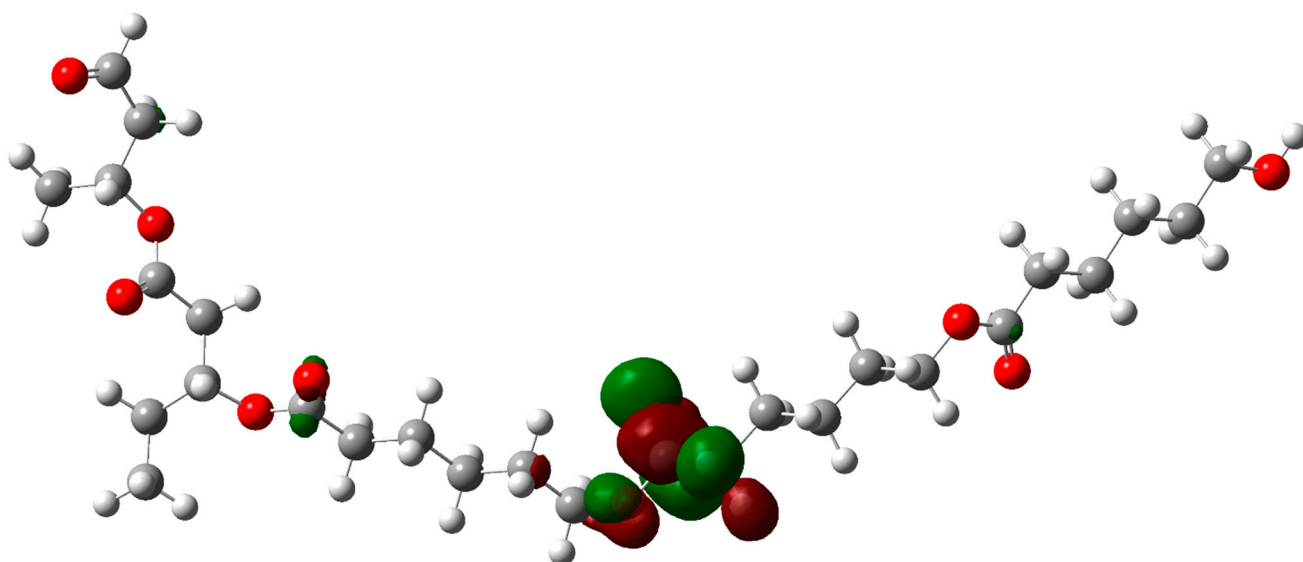**LUMO+4**

## S.2.4 MOLECULAR ORBITALS - BB

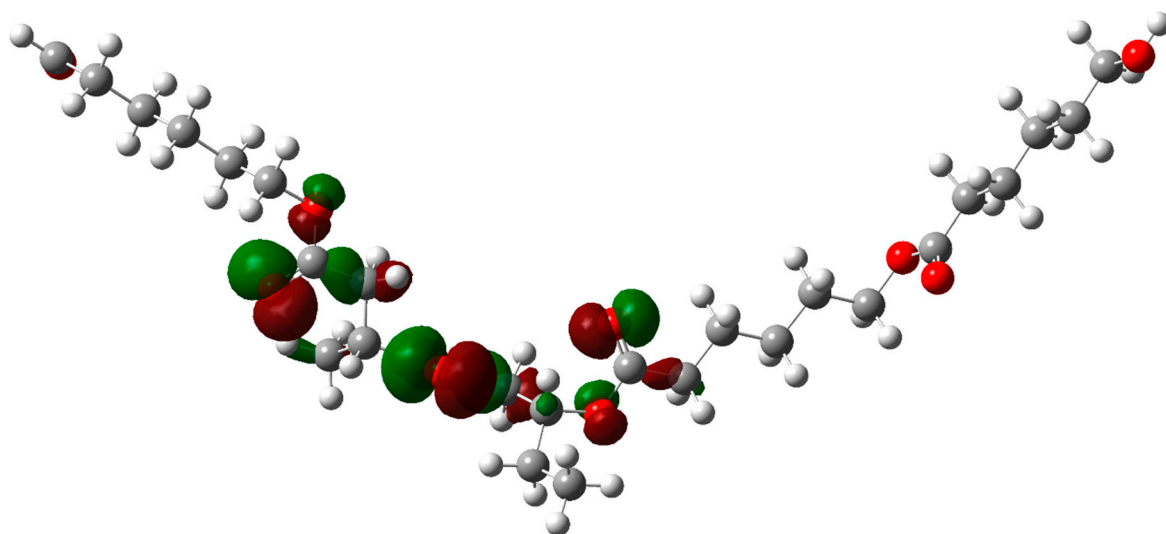**HOMO-4**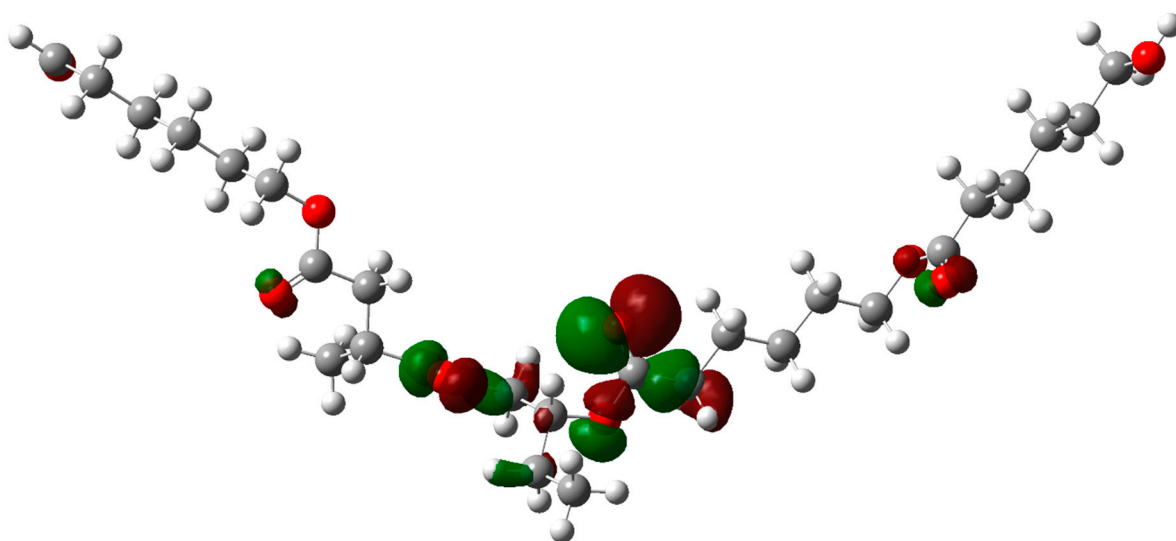**HOMO-3**

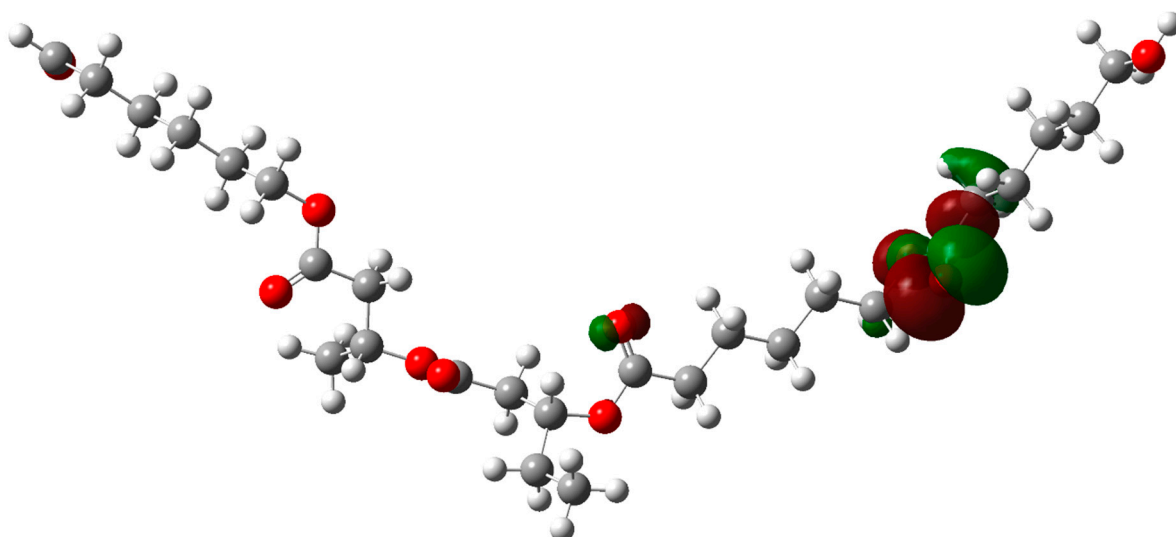**HOMO-2**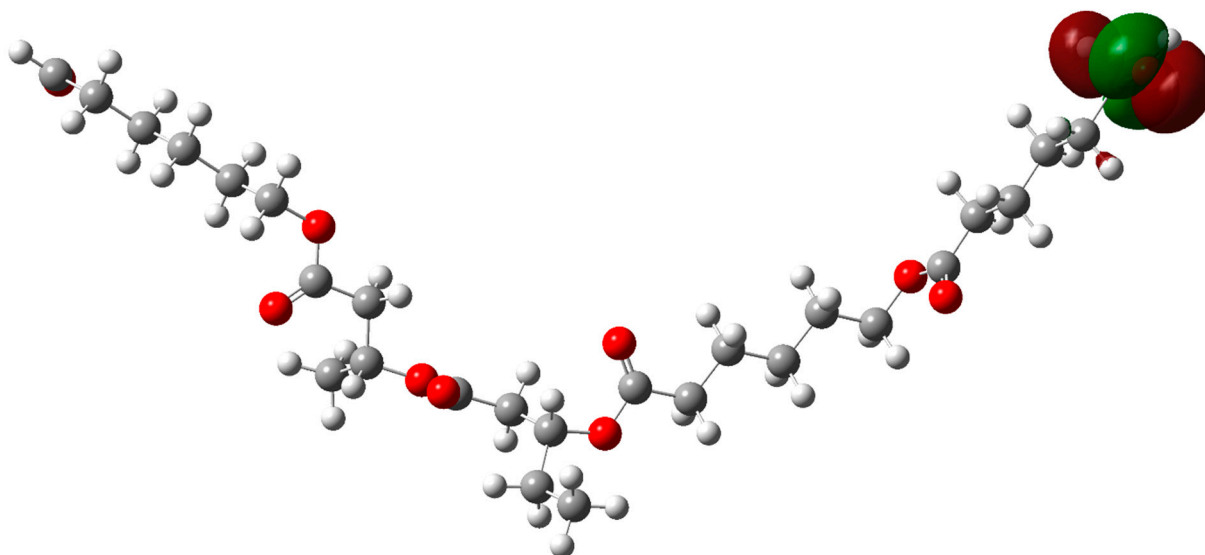**HOMO-1**

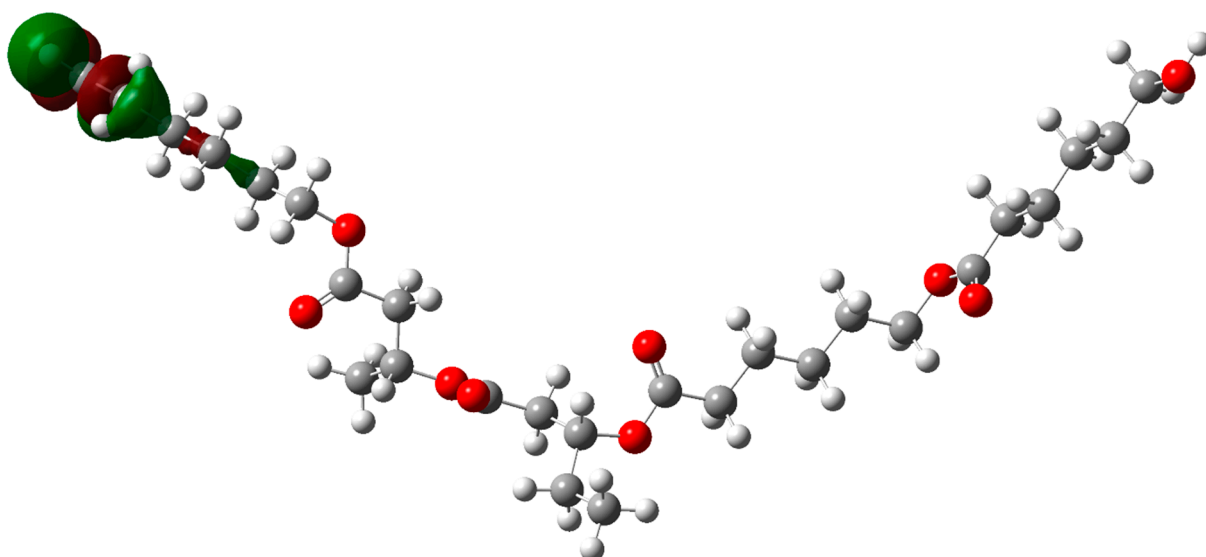**HOMO**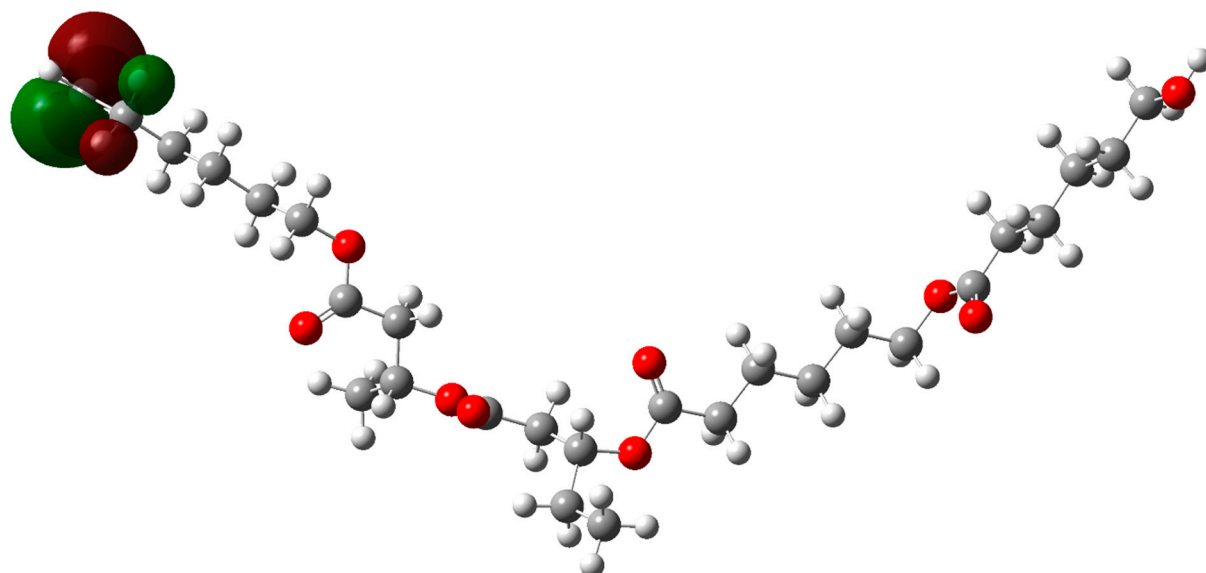**LUMO**

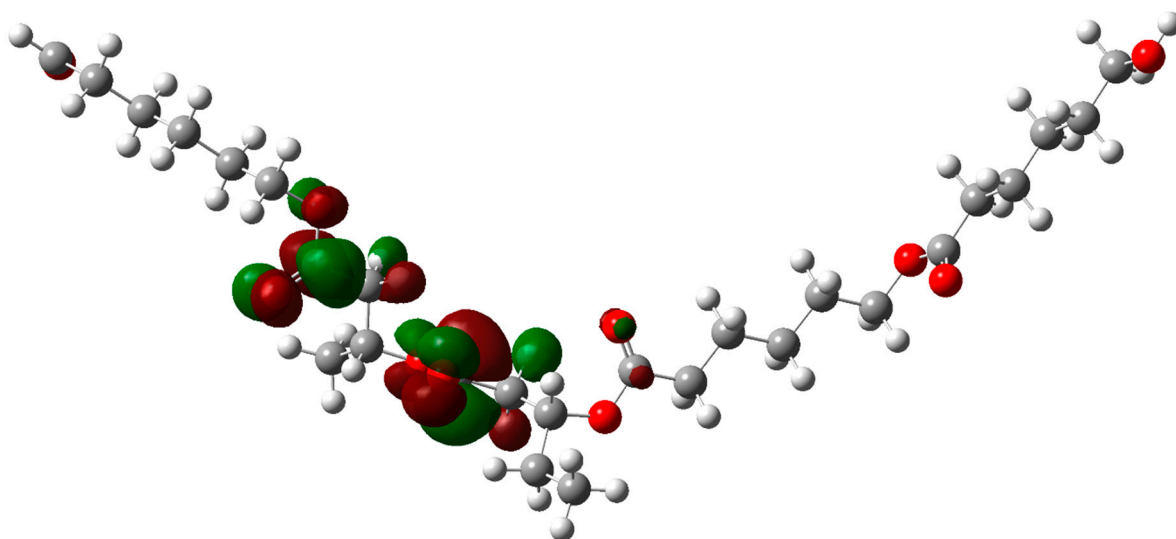**LUMO+1**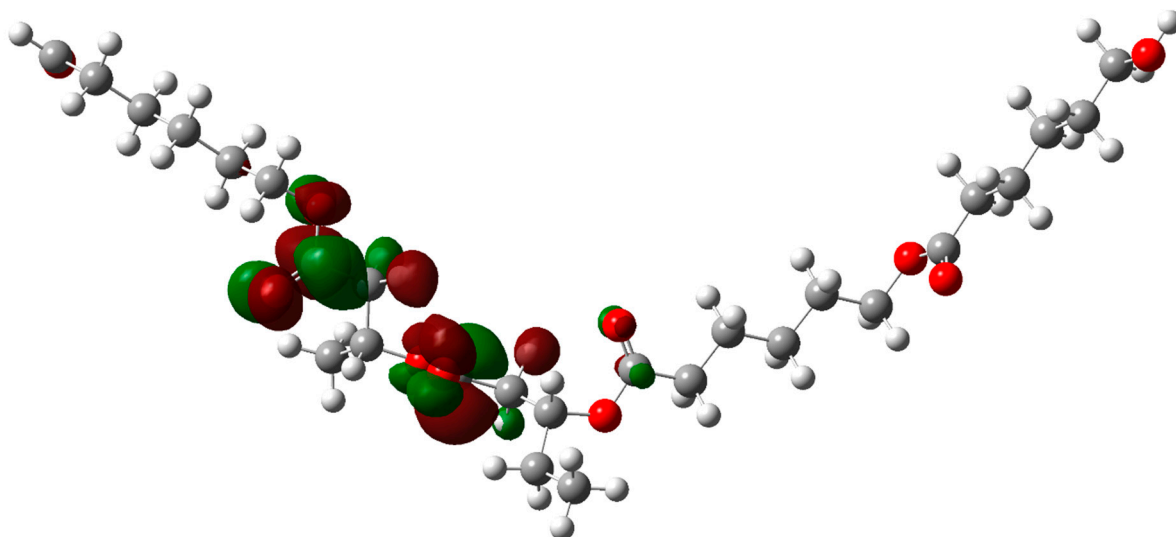**LUMO+2**



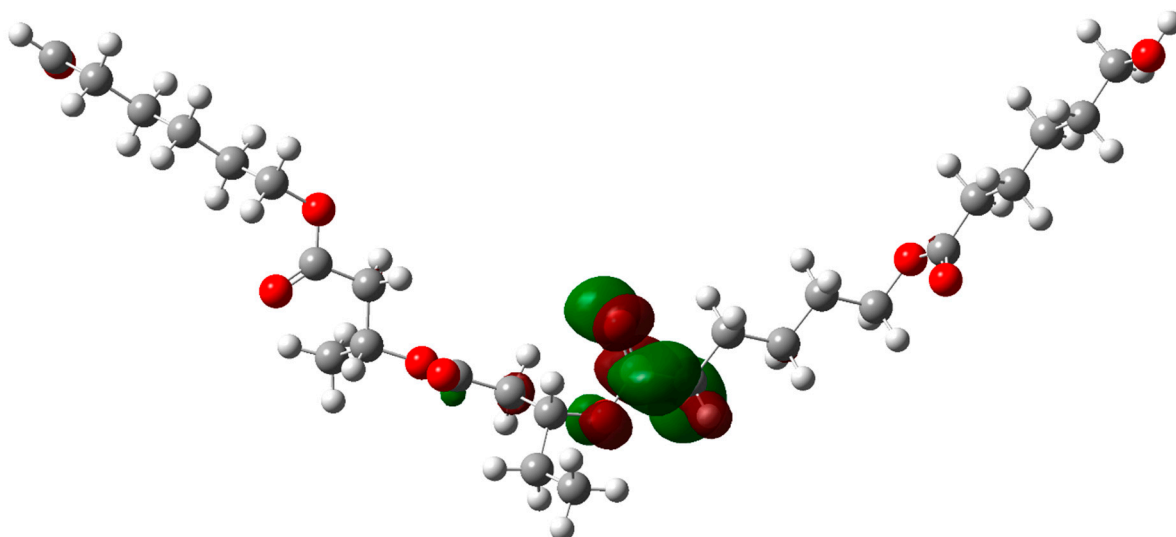**LUMO+3**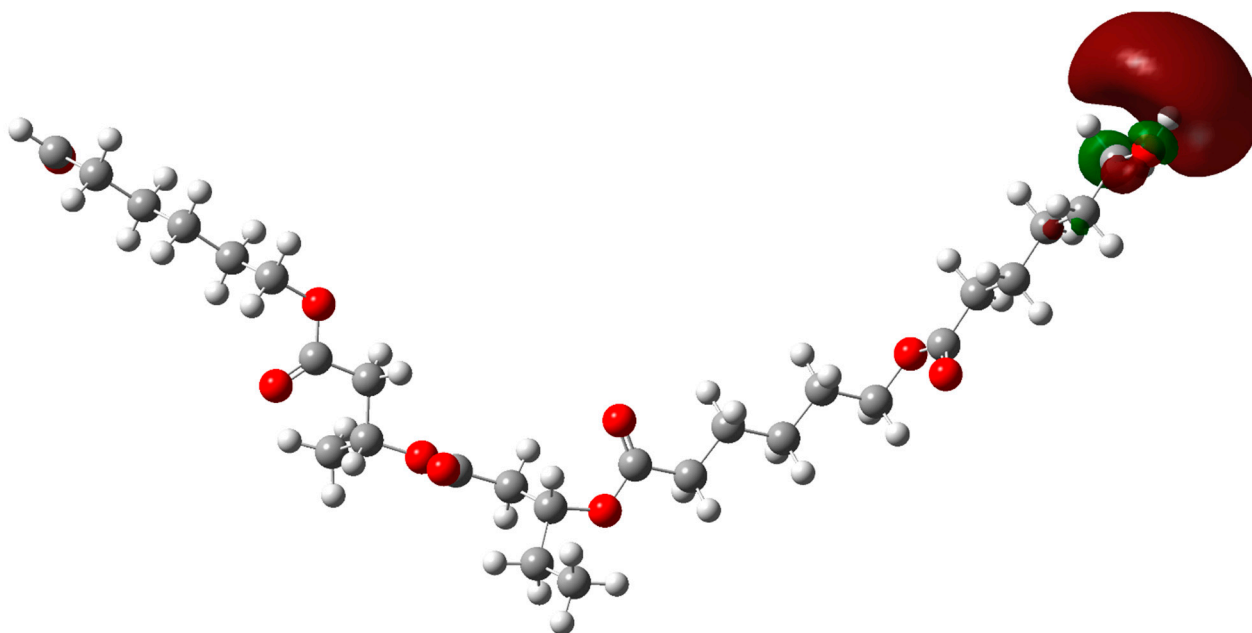**LUMO+4**

## S.2.5 MOLECULAR ORBITALS - BC

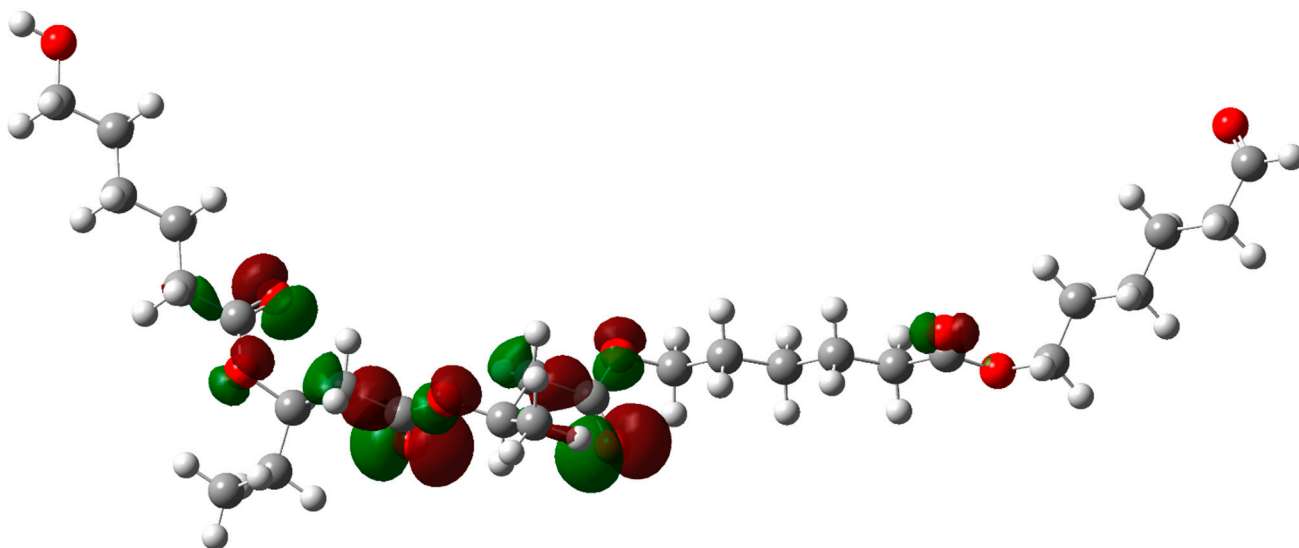

HOMO-4

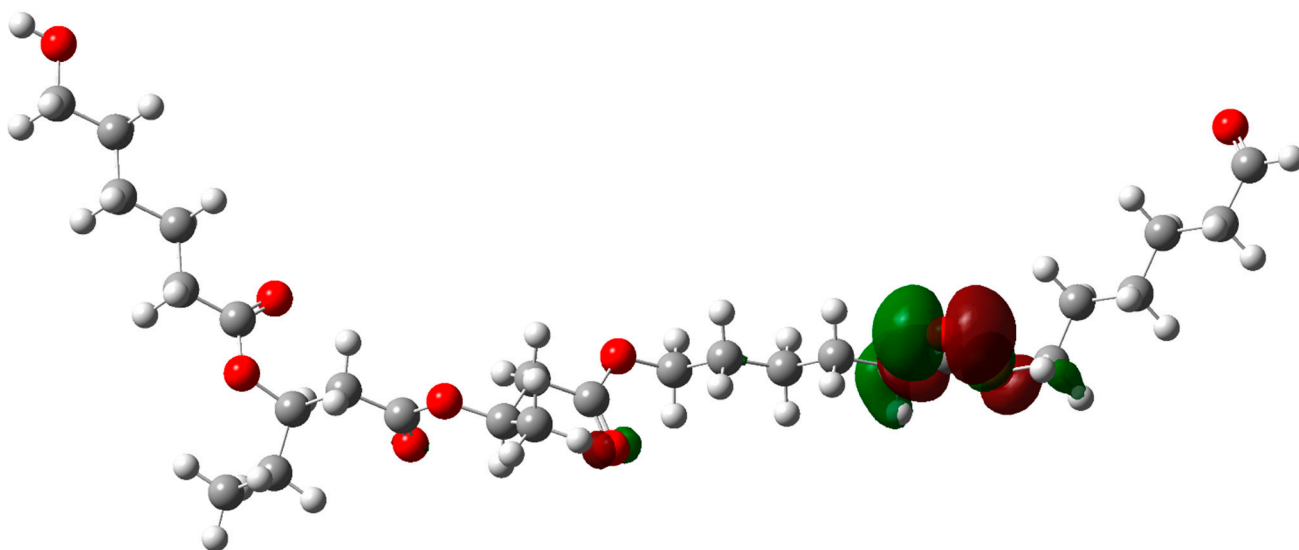

HOMO-3

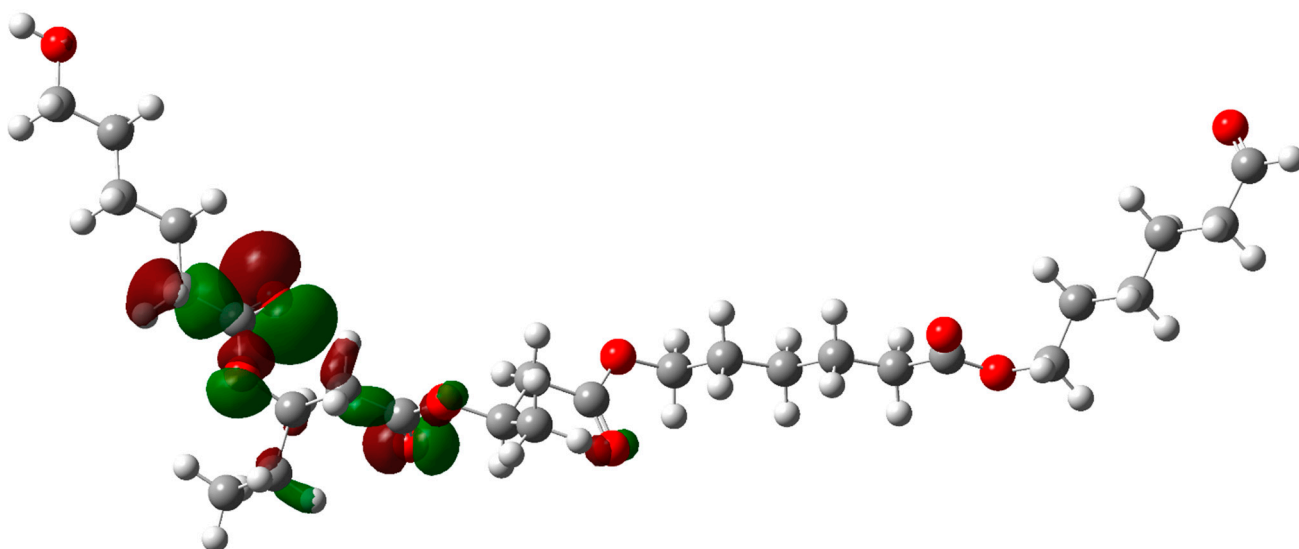**HOMO-2**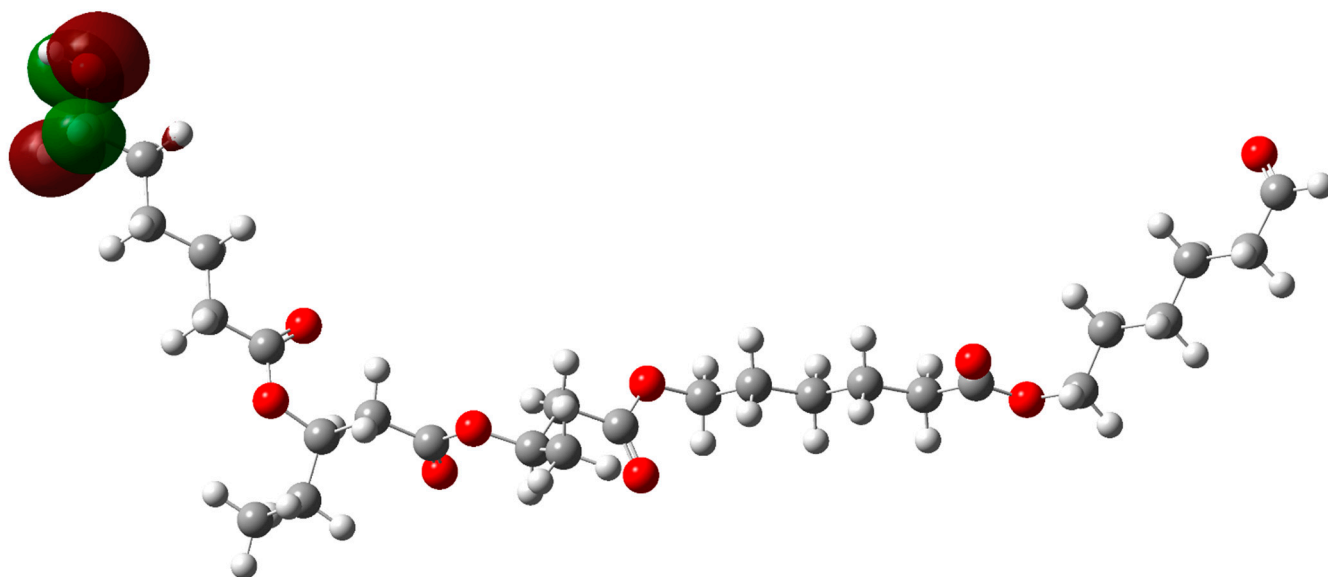**HOMO-1**

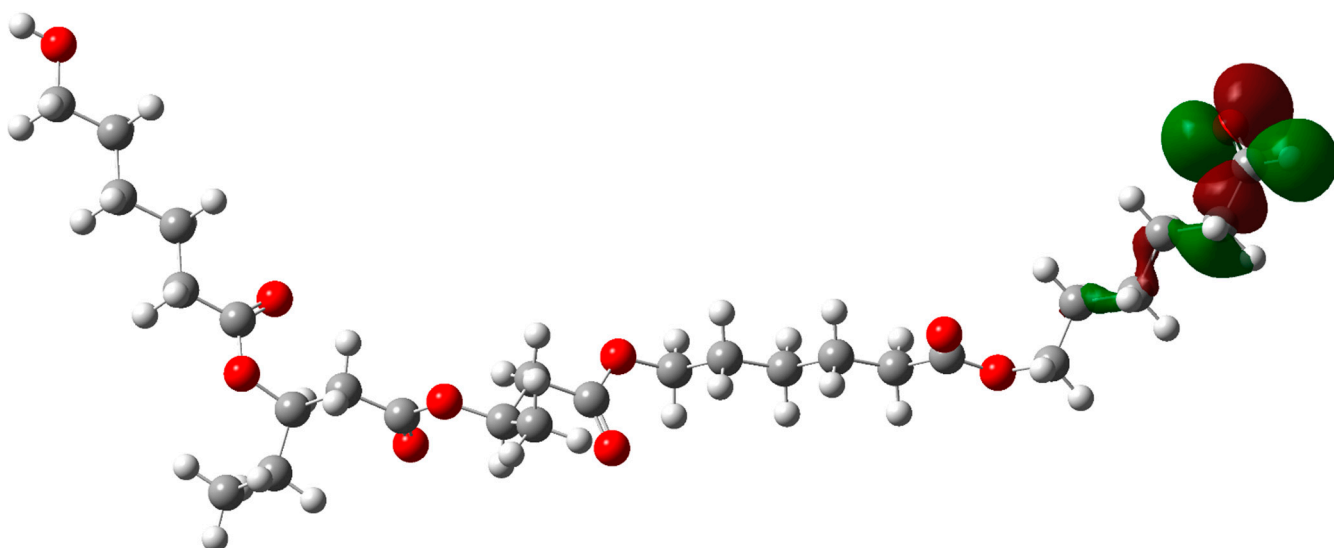**HOMO**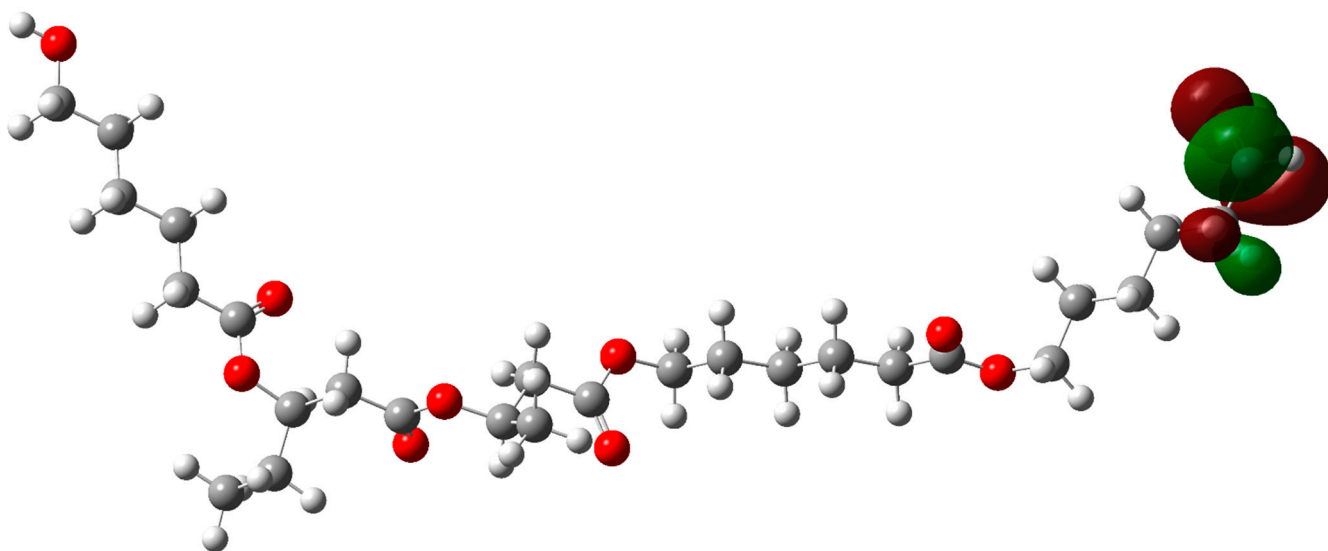**LUMO**

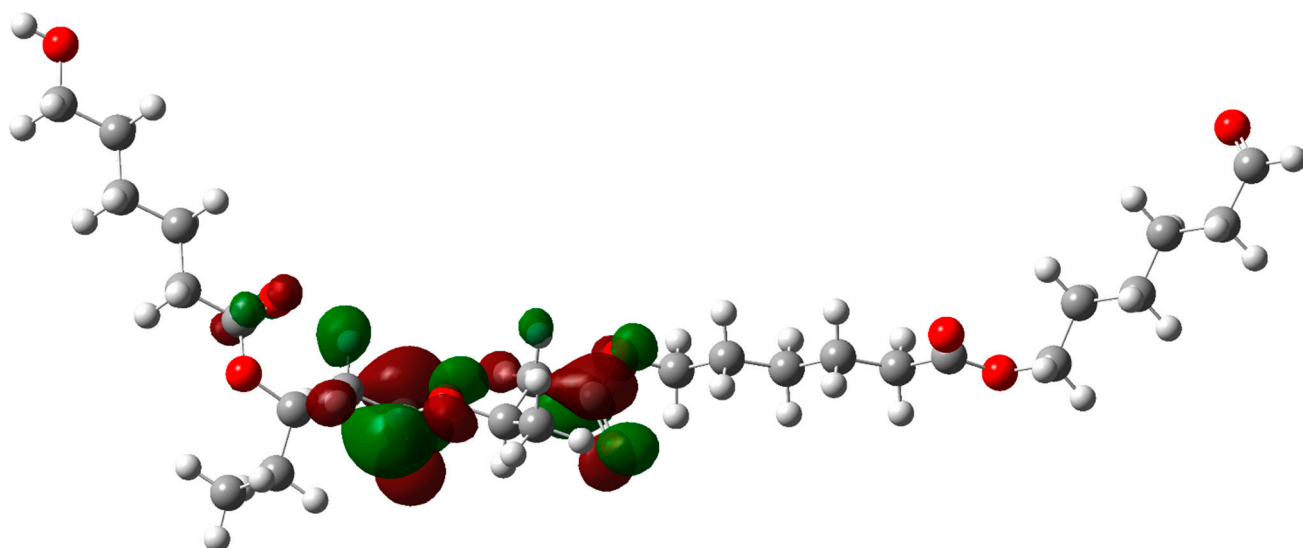**LUMO+1**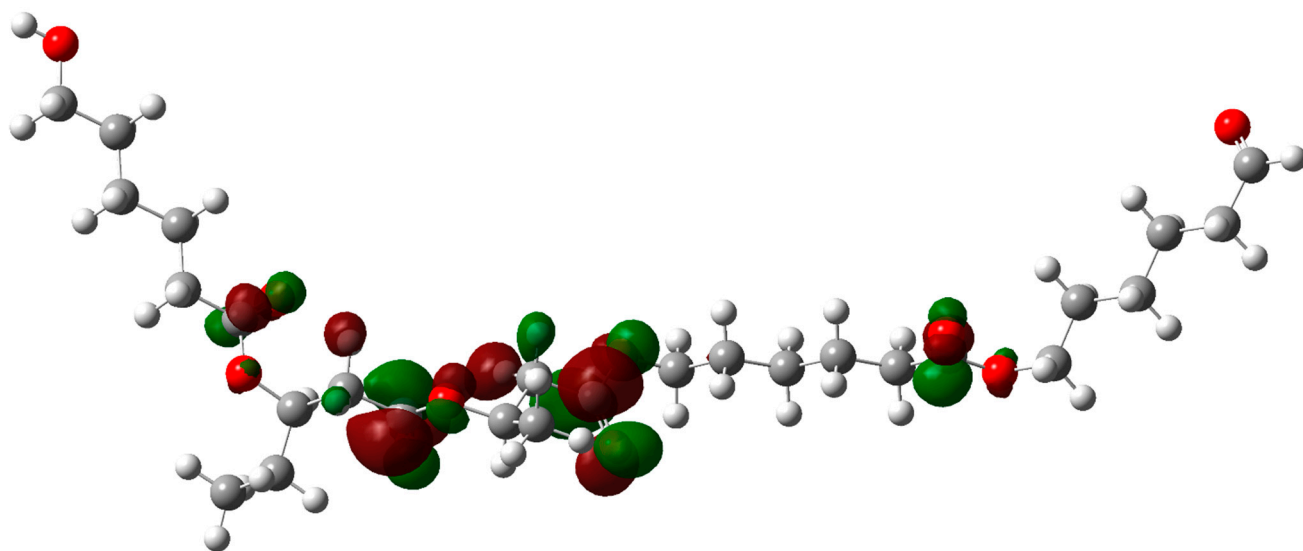**LUMO+2**

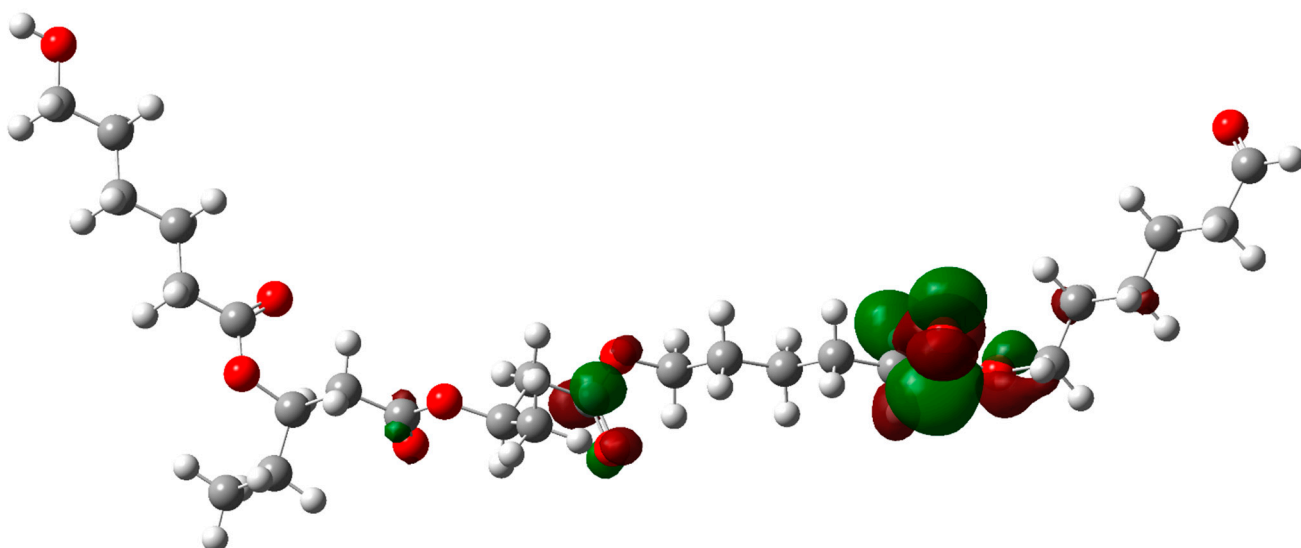**LUMO+3**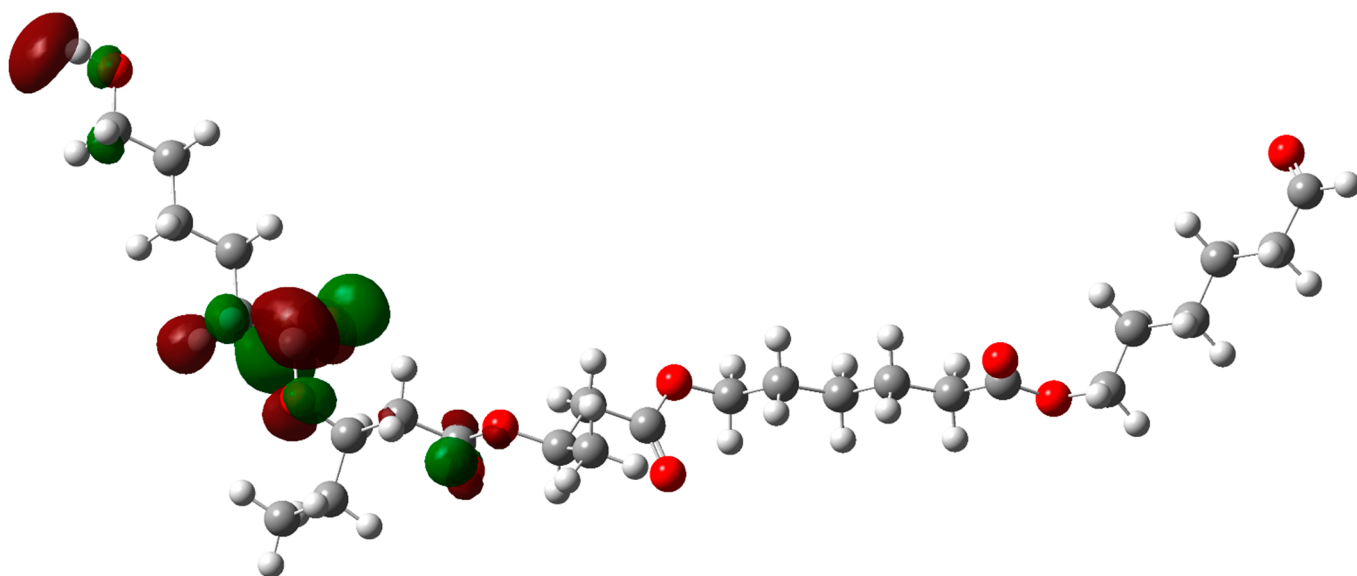**LUMO+4**

## S.2.6 MOLECULAR ORBITALS - BD

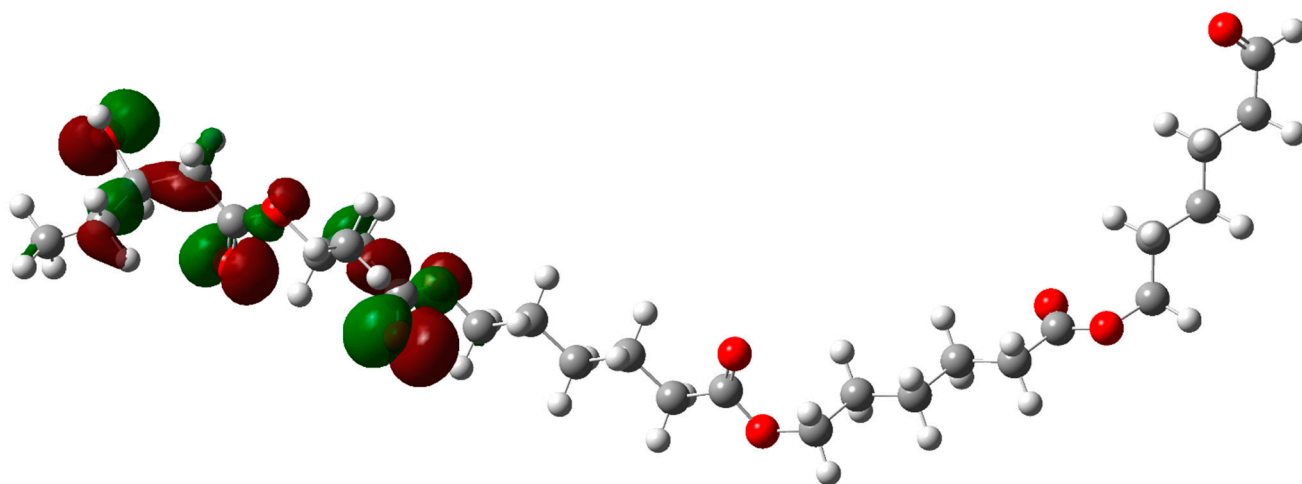

HOMO-4

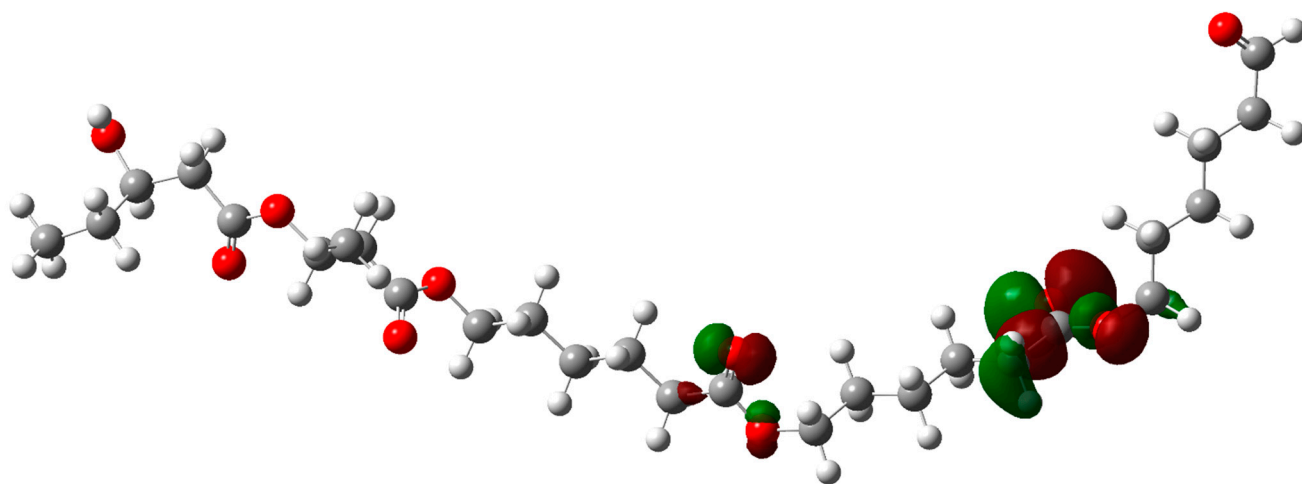

HOMO-3

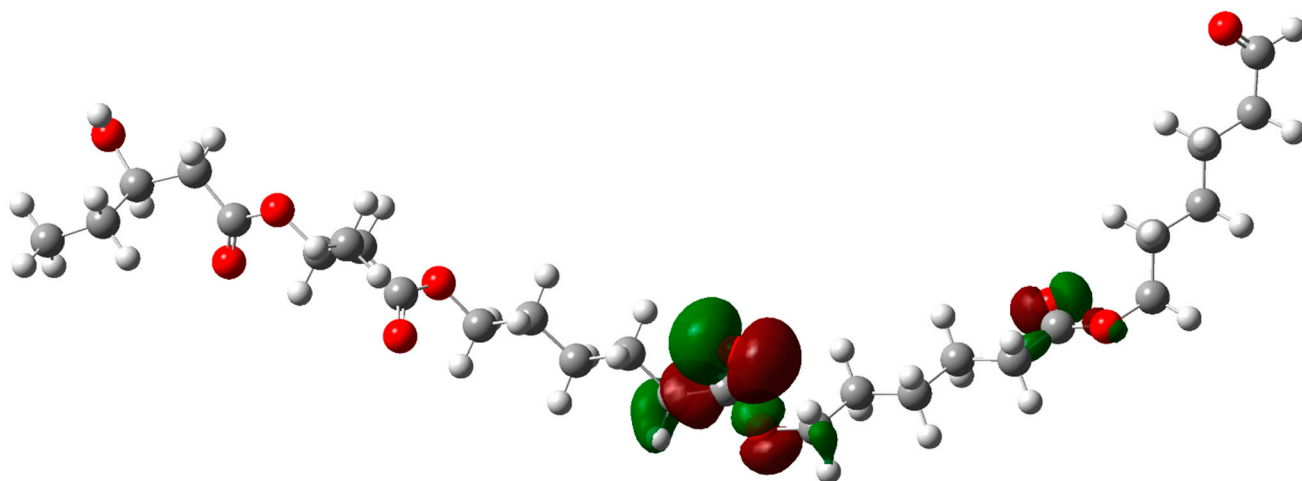**HOMO-2**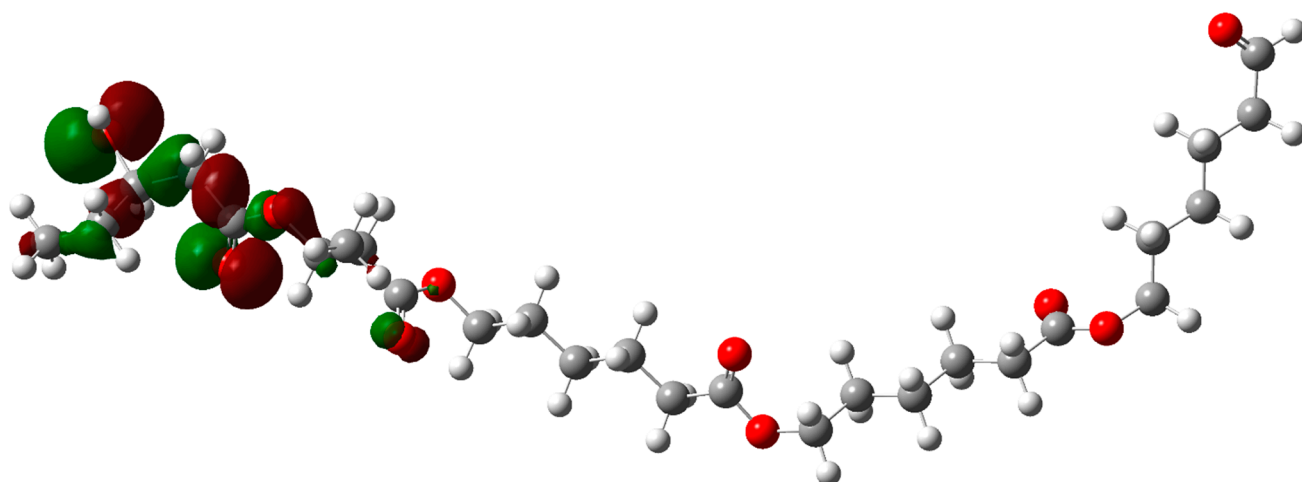**HOMO-1**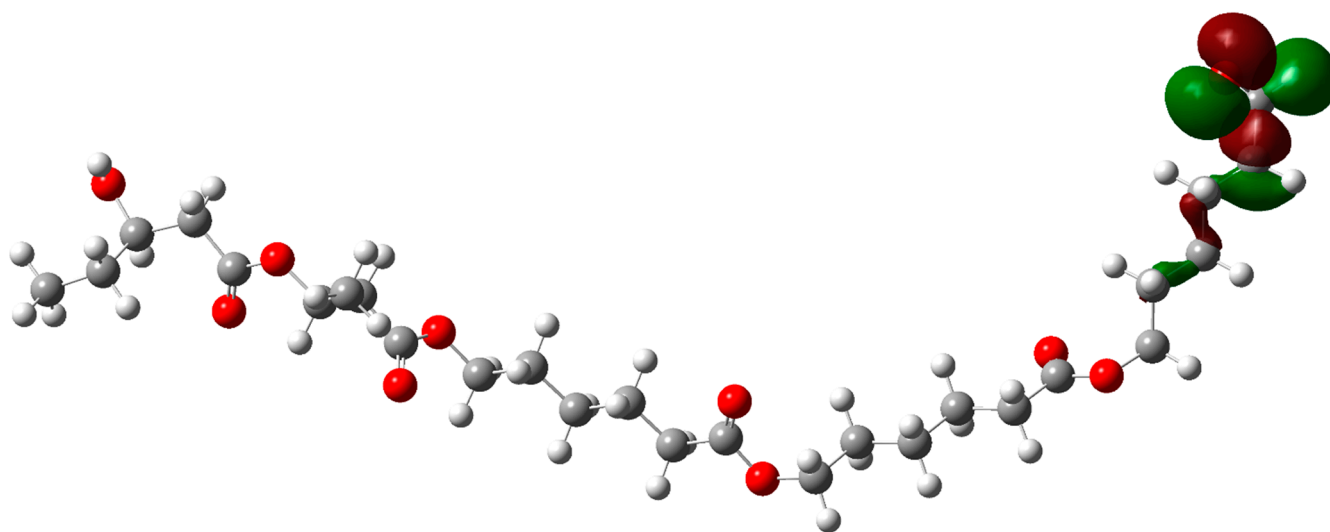**HOMO**



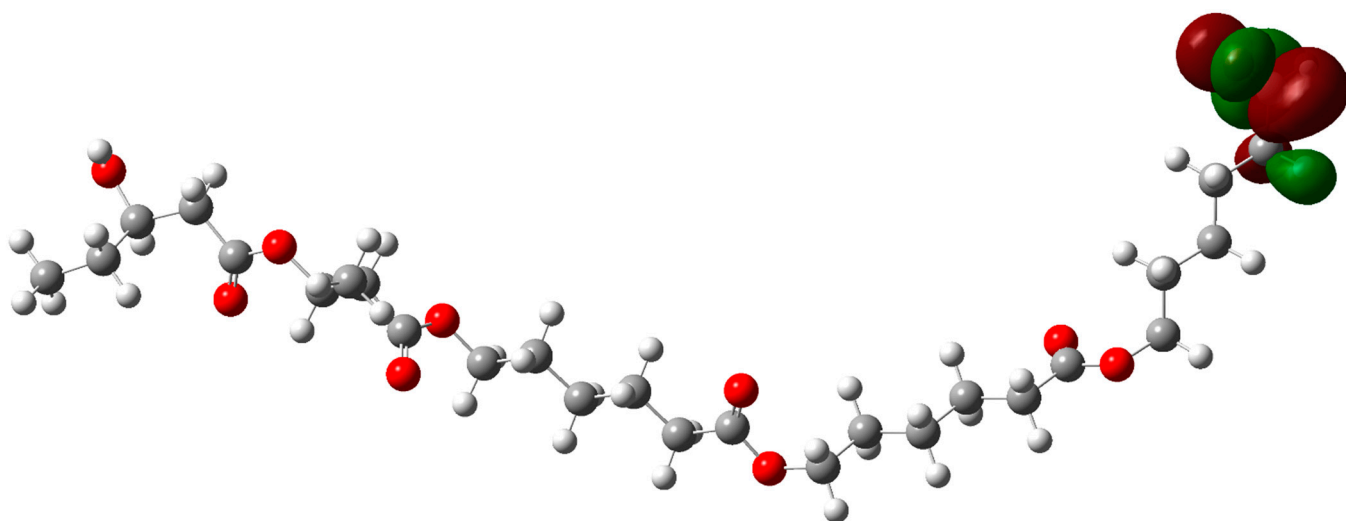**LUMO**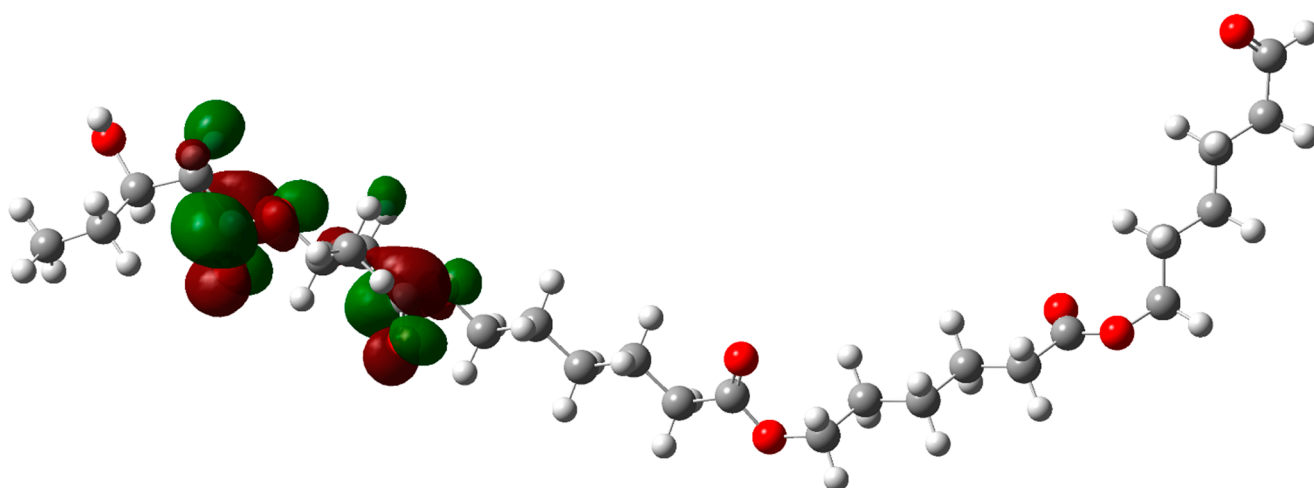**LUMO+1**

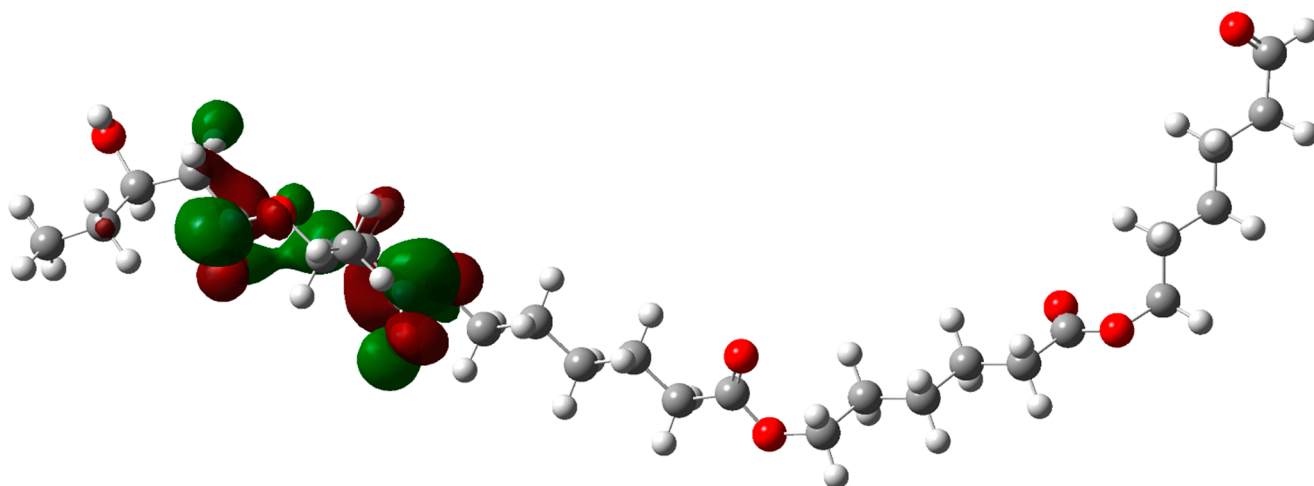**LUMO+2**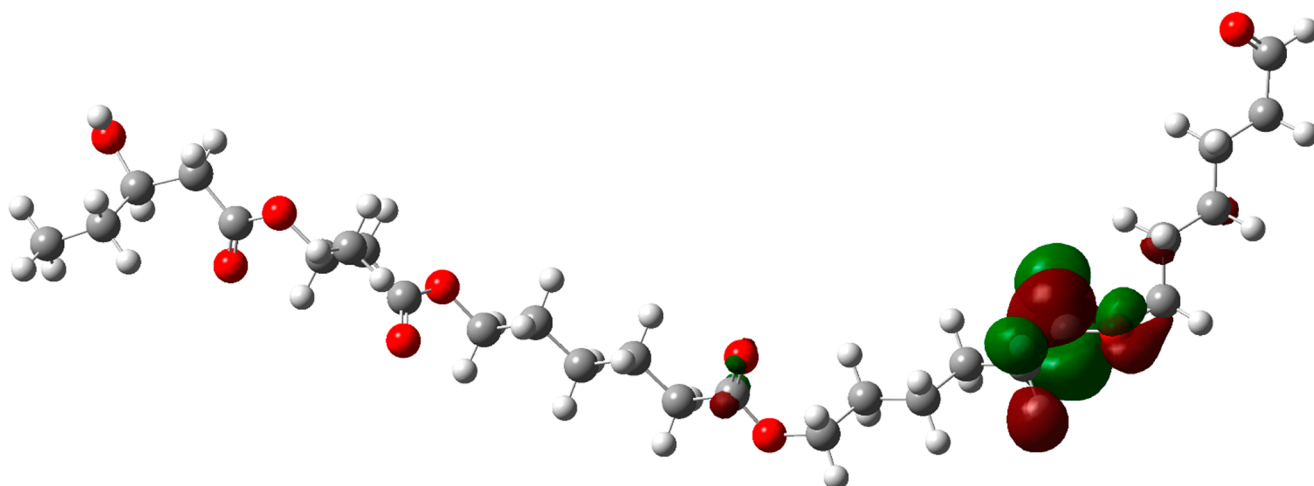**LUMO+3**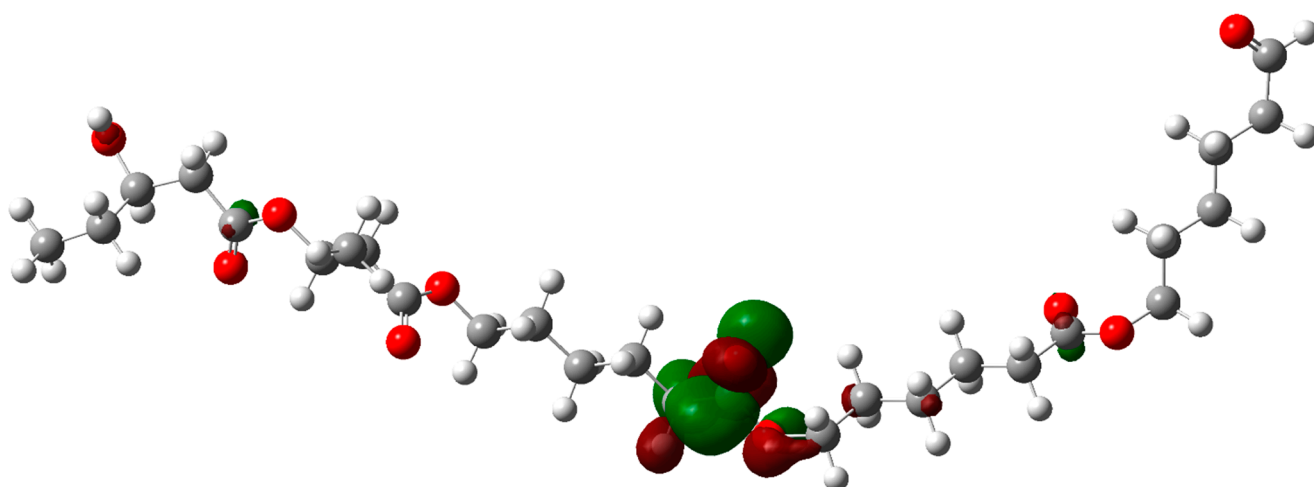**LUMO+4**
